# Supplementary material for: Experimental and theoretical evidence for low-lying excited states in [Cr6E8(PEt3)6] (E = S, Se, Te) cluster molecules
Source: Royal Society of Chemistry journal article supplement (doi:10.1039/d2dt01690g), 2022-01-01
Supplement: d2dt01690g1.pdf [file d2dt01690g1.pdf]

## Supporting Information

### Experimental and Theoretical Evidences for Low-Lying Excited States in [Cr<sub>6</sub>E<sub>8</sub>(PEt<sub>3</sub>)<sub>6</sub>] (E = S, Se, Te) Cluster Molecules

Patrick Bügel,<sup>a</sup> Ivo Krummenacher,<sup>b</sup> Florian Weigend,<sup>c</sup> Andreas Eichhöfer,<sup>d,e\*</sup>

[a] P. Bügel, Institut für Nanotechnologie, Karlsruher Institut für Technologie (KIT), Campus Nord, Hermann-von-Helmholtz-Platz 1, 76344 Eggenstein-Leopoldshafen, Germany

[b] Dr. I. Krummenacher, Institut für Anorganische Chemie, Universität Würzburg, 97074 Würzburg, Germany

[c] Prof. Dr. F. Weigend, Fachbereich Chemie, Universität Marburg, 35032 Marburg, Germany

[d] Dr. A. Eichhöfer, Institut für Nanotechnologie, Karlsruher Institut für Technologie (KIT), Campus Nord, Hermann-von-Helmholtz-Platz 1, 76344 Eggenstein-Leopoldshafen, Germany  
Tel. 49-(0)721-608-26371

Fax: 49-(0)721-608-26368

e-mail: andreas.eichhoefer@kit.edu

[e] Karlsruhe Nano Micro Facility (KNMF), Hermann-von-Helmholtz-Platz 1, 76344 Eggenstein-Leopoldshafen, Germany

## Content

**Equations** for the simulation of the dc and ac magnetic data

**Table S1.** Crystallographic data for **1a**, **1b**, **2a**, **2b** and **3**.

**Table S2.** Comparison of the Crystallographic Data for  $[\text{Cr}_6\text{E}_8(\text{PEt}_3)_6]$  (E = S, Se) cluster molecules from literature

**Table S3.** Mean atomic distances in **1b** and **2b** measured at 120, 200 and 280 K.

**Figure S1 – S4.** Measured and calculated X-ray powder patterns of **1a**, **1b**, **2a** and **2b** and **3**.

**Figure S5** Thermogravimetric analysis of **1a** and **2a** under vacuum ( $10^{-3}$  mbar).

**Figure S6.** ESI-ToF mass spectra of **1a** dissolved in toluene.

**Figure S7.** ESI-ToF mass spectra of **2a** dissolved in toluene.

**Figure S8, S9.** UV-Vis NIR spectra of **1a**, **2a** and **3**.

**Figure S10** Temperature dependence of  $\chi^{-1}$  of **1a**, **1b**, **2a**, **2b** and **3**.

**Figure S11** Magnetization curves at 2K of **1a**, **1b**, **2a**, **2b** and **3**.

**Figure S12** Reduced magnetization curves  $M$  vs  $HT^{-1}$  at different temperatures of **1a**, **2b** and **3**.

**Figure S13** Magnetic moment  $\mu_{\text{eff}}$  vs  $T$  for **1a**, **1b**, **2a**, **2b** and **3**.

**Figure S14, S15, S16.** EPR spectra of **1a** and **2a** as a microcrystalline powder at various temperatures.

**Figure S17.** EPR spectra of **1a** in frozen toluene at various temperatures.

**Table S4** Calculated bond energies [ $\text{kJmol}^{-1}$ ] of Hydrogen in the Compounds  $[\text{M}_6\text{E}_8(\text{H})(\text{PEt}_3)_6]$

**Table S5** Calculated Mean Cr...Cr Distances in **1** and **2**

**Figure S18.** Molecular frontier orbitals of **2**.

**Table S6** Contributions of Cr, S, Se, and P atoms to the molecular HOMO and LUMO orbitals of **1** and **2** from Mulliken population analysis.

**Table S7** Lowest energy and dipole active singlet transitions in **1** and **2**

**Figure S19.** Theoretical (TDDFT) electronic spectra of **1** calculated with three different functionals.

**Table S8** Calculated energies  $\Delta E$  of the excited states in **1** and **2**

**Figure S20** Theoretical electronic spectra of the closed shell and excited state of **2** compared to the experimental ones.

**List of compounds**

- 1a**     $[\text{Cr}_6\text{S}_8(\text{PEt}_3)_6] \cdot 1.5 \text{ C}_4\text{H}_8\text{O}$
- 1b**     $[\text{Cr}_6\text{S}_8(\text{PEt}_3)_6]$
- 2a**     $[\text{Cr}_6\text{Se}_8(\text{PEt}_3)_6] \cdot 1.5 \text{ C}_4\text{H}_8\text{O}$
- 2b**     $[\text{Cr}_6\text{Se}_8(\text{PEt}_3)_6]$
- 3**      $[\text{Cr}_6\text{Te}_8(\text{PEt}_3)_6]$

**Table S1.** Crystallographic data for [Cr<sub>6</sub>S<sub>8</sub>(PEt<sub>3</sub>)<sub>6</sub>]\*1.5C<sub>4</sub>H<sub>8</sub>O (**1a**), [Cr<sub>6</sub>S<sub>8</sub>(PEt<sub>3</sub>)<sub>6</sub>] (**1b**), [Cr<sub>6</sub>Se<sub>8</sub>(PEt<sub>3</sub>)<sub>6</sub>]\*1.5C<sub>4</sub>H<sub>8</sub>O (**2a**) and [Cr<sub>6</sub>Se<sub>8</sub>(PEt<sub>3</sub>)<sub>6</sub>] (**2b**) and [Cr<sub>6</sub>Te<sub>8</sub>(PEt<sub>3</sub>)<sub>6</sub>] (**3**).

|                                                          | <b>1a</b>                                                                                    | <b>1b</b>                                                                     | <b>2a</b>                                                                                     | <b>2b</b>                                                                      | <b>3</b>                                                                       |
|----------------------------------------------------------|----------------------------------------------------------------------------------------------|-------------------------------------------------------------------------------|-----------------------------------------------------------------------------------------------|--------------------------------------------------------------------------------|--------------------------------------------------------------------------------|
| sum formula                                              | C <sub>36</sub> H <sub>90</sub> Cr <sub>6</sub> P <sub>6</sub> S <sub>8</sub> +<br>(solvent) | C <sub>36</sub> H <sub>90</sub> Cr <sub>6</sub> P <sub>6</sub> S <sub>8</sub> | C <sub>36</sub> H <sub>90</sub> Cr <sub>6</sub> P <sub>6</sub> Se <sub>8</sub> +<br>(solvent) | C <sub>36</sub> H <sub>90</sub> Cr <sub>6</sub> P <sub>6</sub> Se <sub>8</sub> | C <sub>36</sub> H <sub>90</sub> Cr <sub>6</sub> P <sub>6</sub> Te <sub>8</sub> |
| <i>fw</i> [g/mol]                                        | 1277.37                                                                                      | 1277.37                                                                       | 1652.57                                                                                       | 1652.57                                                                        | 2041.69                                                                        |
| <i>T</i> [K]                                             | 180(2)                                                                                       | 180(2)                                                                        | 180(2)                                                                                        | 180(2)                                                                         | 150(2)                                                                         |
| crystal system                                           | trigonal                                                                                     | triclinic                                                                     | trigonal                                                                                      | triclinic                                                                      | monoclinic                                                                     |
| space group                                              | <i>R</i> -3                                                                                  | <i>P</i> -1                                                                   | <i>R</i> -3                                                                                   | <i>P</i> -1                                                                    | <i>I</i> 2/a                                                                   |
| Cell                                                     |                                                                                              |                                                                               |                                                                                               |                                                                                |                                                                                |
| <i>a</i> [pm]                                            | 1709.70(4)                                                                                   | 1178.92(4)                                                                    | 1728.9(2)                                                                                     | 1194.06(5)                                                                     | 1342.2(3)                                                                      |
| <i>b</i>                                                 | 1709.70(4)                                                                                   | 1262.30(5)                                                                    | 1728.9(2)                                                                                     | 1278.68(5)                                                                     | 1968.0(4)                                                                      |
| <i>c</i>                                                 | 1943.78(8)                                                                                   | 2022.22(7)                                                                    | 1954.4(4)                                                                                     | 2021.65(8)                                                                     | 2413.5(5)                                                                      |
| <i>α</i>                                                 | 90                                                                                           | 88.924(3)                                                                     | 90                                                                                            | 88.733(3)                                                                      | 90                                                                             |
| <i>β</i> [°]                                             | 90                                                                                           | 87.547(3)                                                                     | 90                                                                                            | 87.029(3)                                                                      | 101.00(3)                                                                      |
| <i>γ</i>                                                 | 120                                                                                          | 72.177(3)                                                                     | 120                                                                                           | 71.591(3)                                                                      | 90                                                                             |
| <i>V</i> [10 <sup>6</sup> pm <sup>3</sup> ]              | 4920.6(3)                                                                                    | 2862.3(2)                                                                     | 5058.9(17)                                                                                    | 2924.7(2)                                                                      | 6186(3)                                                                        |
| <i>Z</i>                                                 | 3                                                                                            | 2                                                                             | 3                                                                                             | 2                                                                              | 4                                                                              |
| <i>d<sub>c</sub></i> [g cm <sup>-3</sup> ]               | 1.293                                                                                        | 1.482                                                                         | 1.627                                                                                         | 1.877                                                                          | 2.192                                                                          |
| <i>μ</i> (λ) [mm <sup>-1</sup> ]                         | 1.382                                                                                        | 1.584                                                                         | 5.414                                                                                         | 6.243                                                                          | 6.781                                                                          |
| <i>F</i> [000]                                           | 2004                                                                                         | 1336                                                                          | 2436                                                                                          | 1624                                                                           | 3824                                                                           |
| cryst.size [mm <sup>3</sup> ]                            | 0.4 × 0.217 × 0.09                                                                           | 0.25 × 0.21 × 0.18                                                            | 0.18 × 0.13 × 0.12                                                                            | 0.36 × 0.287 × 0.24                                                            | 0.11 × 0.10 × 0.09                                                             |
| <i>λ</i> [Å]                                             | 0.71073                                                                                      | 0.71073                                                                       | 0.71073                                                                                       | 0.71073                                                                        | synchrotron (0.80000)                                                          |
| 2θ range [°]                                             | 3.5–53.5                                                                                     | 4.0–70.5                                                                      | 4.7–53.5                                                                                      | 3.4–53.5                                                                       | 3.0–65                                                                         |
| meas reflns                                              | 12770                                                                                        | 65054                                                                         | 10660                                                                                         | 28738                                                                          | 17437                                                                          |
| unique reflns                                            | 2321                                                                                         | 23669                                                                         | 2377                                                                                          | 12347                                                                          | 6965                                                                           |
| <i>R</i> <sub>int</sub>                                  | 0.0703                                                                                       | 0.0693                                                                        | 0.0628                                                                                        | 0.0578                                                                         | 0.0391                                                                         |
| reflns with <i>I</i> > 2σ( <i>I</i> )                    | 1999                                                                                         | 17188                                                                         | 2129                                                                                          | 9980                                                                           | 6574                                                                           |
| restrs / params                                          | 0 / 88                                                                                       | 0 / 523                                                                       | 0 / 88                                                                                        | 0 / 523                                                                        | 0 / 262                                                                        |
| <i>R</i> 1( <i>I</i> > 2σ( <i>I</i> )) <sup>a</sup>      | 0.0266                                                                                       | 0.0327                                                                        | 0.0236                                                                                        | 0.0366                                                                         | 0.0270                                                                         |
| <i>wR</i> 2(all data) <sup>b</sup>                       | 0.0733                                                                                       | 0.0744                                                                        | 0.0657                                                                                        | 0.0916                                                                         | 0.0718                                                                         |
| Solvent mask / <i>e</i> <sup>-</sup> per<br>formula unit | 109                                                                                          |                                                                               | 93.7                                                                                          |                                                                                |                                                                                |
| Diff Peak/hole [eÅ <sup>-3</sup> ]                       | 0.41 / -0.63                                                                                 | 0.73 / -0.89                                                                  | 0.59 / -0.73                                                                                  | 1.01 / -1.69                                                                   | 0.92 / -1.22                                                                   |
| CCDC No.                                                 |                                                                                              |                                                                               |                                                                                               |                                                                                |                                                                                |

<sup>a</sup>  $R1 = \frac{\sum ||F_o| - |F_c||}{\sum |F_o|}$ . <sup>b</sup>  $wR2 = \left\{ \frac{\sum [w(F_o^2 - F_c^2)^2]}{\sum [w(F_o^2)^2]} \right\}^{1/2}$

**Table S2.** Crystallographic Data for  $[\text{Cr}_6\text{E}_8(\text{PEt}_3)_6]$  (E = S, Se) cluster molecules from literature <sup>a,b</sup>

|                                             |               | $[\text{Cr}_6\text{S}_8(\text{PEt}_3)_6]$<br>$\cdot 2 \text{C}_6\text{H}_6$ | $[\text{Cr}_6\text{Se}_8(\text{PEt}_3)_6]$<br>$\cdot 2 \text{C}_6\text{H}_6$ | $[\text{Cr}_6\text{Se}_8(\text{PEt}_3)_6]^c$ | $[\text{Cr}_6\text{Se}_8(\text{H})(\text{PEt}_3)_6]$<br>$\cdot 2 \text{thf}$ | $[\text{Cr}_6\text{Se}_8(\text{PEt}_3)_6]^c$ |
|---------------------------------------------|---------------|-----------------------------------------------------------------------------|------------------------------------------------------------------------------|----------------------------------------------|------------------------------------------------------------------------------|----------------------------------------------|
| ref                                         |               | <i>a</i>                                                                    | <i>a</i>                                                                     | <i>a</i>                                     | <i>b</i>                                                                     | <i>b</i>                                     |
| <i>T</i> [K]                                |               | <i>not given</i>                                                            | <i>not given</i>                                                             | <i>not given</i>                             | 293                                                                          | 226                                          |
| crystal system                              |               | trigonal                                                                    | trigonal                                                                     | triclinic                                    | trigonal                                                                     | triclinic                                    |
| space group                                 |               | <i>R</i> -3                                                                 | <i>R</i> -3                                                                  | <i>P</i> -1                                  | <i>R</i> -3                                                                  | <i>P</i> -1                                  |
| Cell                                        | <i>a</i> [pm] | 1730.1(3)                                                                   | 1751.1(8)                                                                    | 1204.1(2)                                    | 1738.4(4)                                                                    | 1206.1                                       |
|                                             | <i>b</i>      |                                                                             |                                                                              | 1288.8(2)                                    |                                                                              | 1288.7                                       |
|                                             | <i>c</i>      | 1974.0(2)                                                                   | 1996.0(7)                                                                    | 2039.8(2)                                    | 1976.8(4)                                                                    | 2031.8                                       |
|                                             | $\alpha$      |                                                                             |                                                                              | 88.84(1)                                     |                                                                              | 88.58                                        |
|                                             | $\beta$ [°]   |                                                                             |                                                                              | 87.02(2)                                     |                                                                              | 86.76                                        |
|                                             | $\gamma$      |                                                                             |                                                                              | 71.43(1)                                     |                                                                              | 71.75                                        |
| <i>V</i> [10 <sup>6</sup> pm <sup>3</sup> ] |               | 5116.7(13)                                                                  | 5301(4)                                                                      | 2996.6(13)                                   | 5173(2)                                                                      | 2994.3                                       |

<sup>a</sup> K. Tsuge, H. Imoto, T. Saito, *Bull. Chem. Soc. Jpn.* **1996**, *69*, 627.

<sup>b</sup> S. Kamiguchi, H. Imoto, T. Saito, *Inorg. Chem.* **1998**, *37*, 6852-6857.

<sup>c</sup> data from literature were transformed for comparative reason from the non-conventional setting to a conventional setting

**Table S3.** Mean atomic distances and standard deviations [pm] in a) **1b** and b) **2b** measured at 120, 200 and 280 K <sup>a</sup>

|           |           | exp         |             |             |          |
|-----------|-----------|-------------|-------------|-------------|----------|
|           |           | 120 K       | 200 K       | 280 K       | $\Delta$ |
| <b>1b</b> | d Cr–P    | 241.26±0.43 | 241.52±0.41 | 241.75±0.40 | 0.49     |
|           | d Cr–S    | 233.50±0.54 | 233.65±0.45 | 233.81±0.41 | 0.31     |
|           | d Cr···Cr | 256.74±0.73 | 258.66±0.86 | 261.20±0.79 | 4.46     |
|           | d S···S   | 329.34±0.95 | 329.42±0.86 | 329.47±0.76 | 0.13     |
| <b>2b</b> | d Cr–P    | 241.89±0,38 | 242.16±0.43 | 242.57±0.24 | 0.68     |
|           | d Cr–Se   | 244.56±0,54 | 244.85±0.48 | 245.19±0.39 | 0.63     |
|           | d Cr···Cr | 263.55±0,68 | 265.45±0.73 | 268.14±0.67 | 4.59     |
|           | d Se···Se | 345.24±0,73 | 345.53±0.71 | 345.91±0.72 | 0.67     |

<sup>a</sup> calculated as the sum over all distances divided by the number of distances

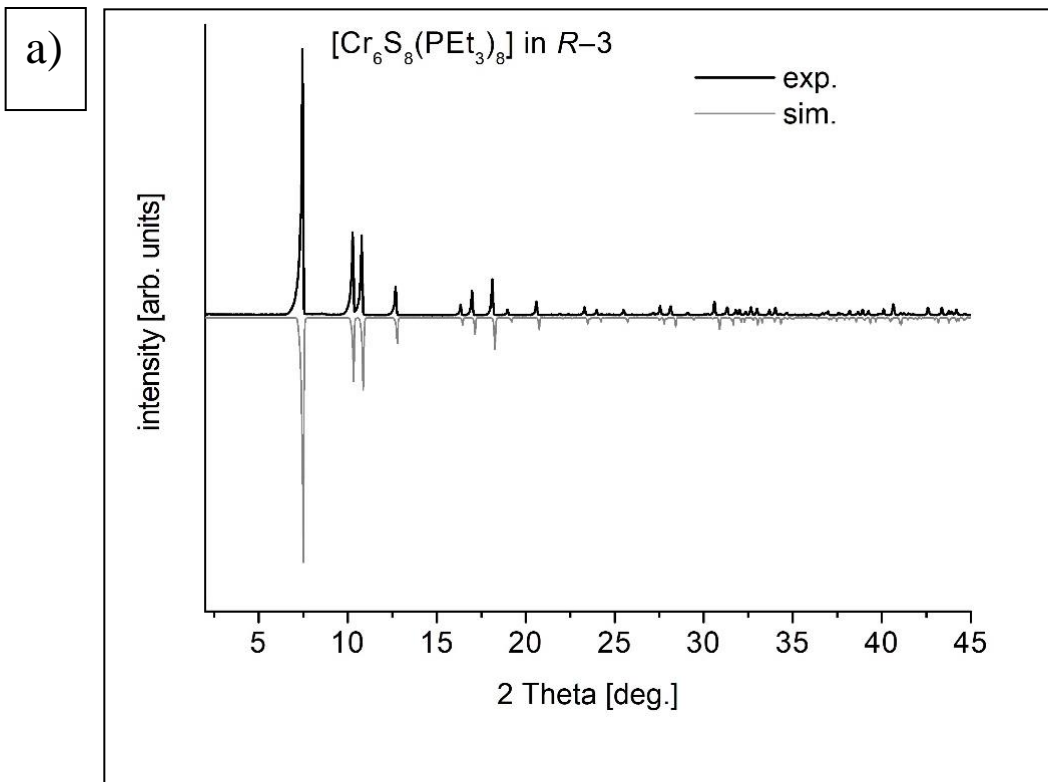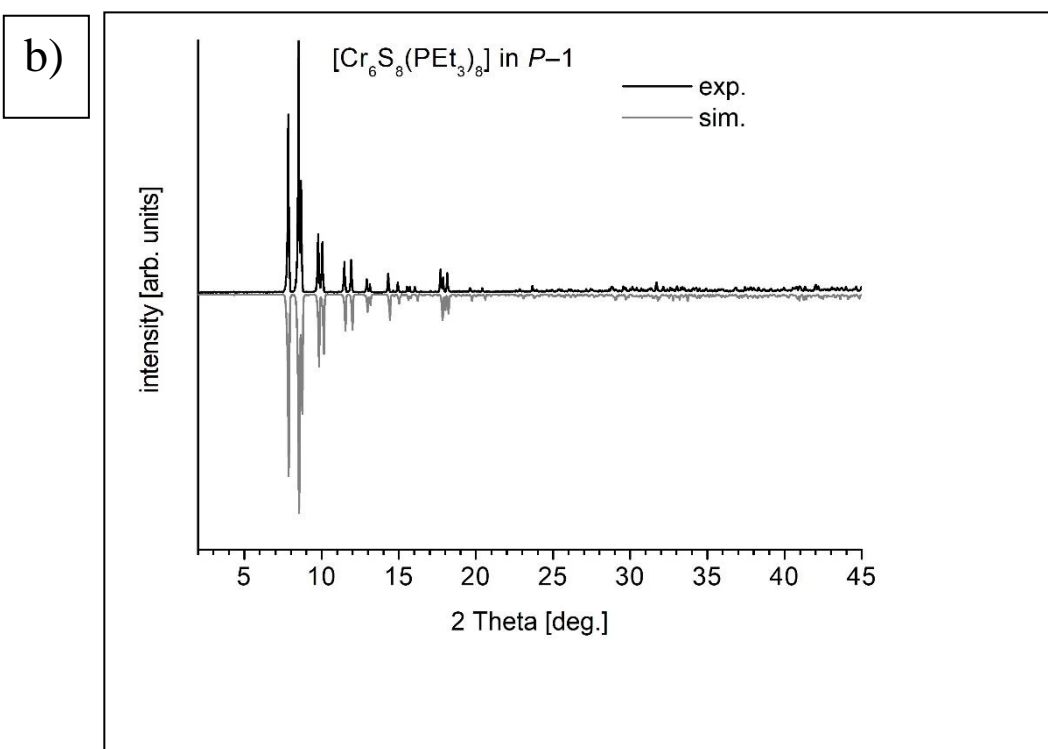

**Figure S1.** Measured (black) and simulated (grey) X-ray powder patterns ( $\text{CuK}\alpha_1$ ) for a) **1a** and b) **1b** (measured as a dried crystalline powder).

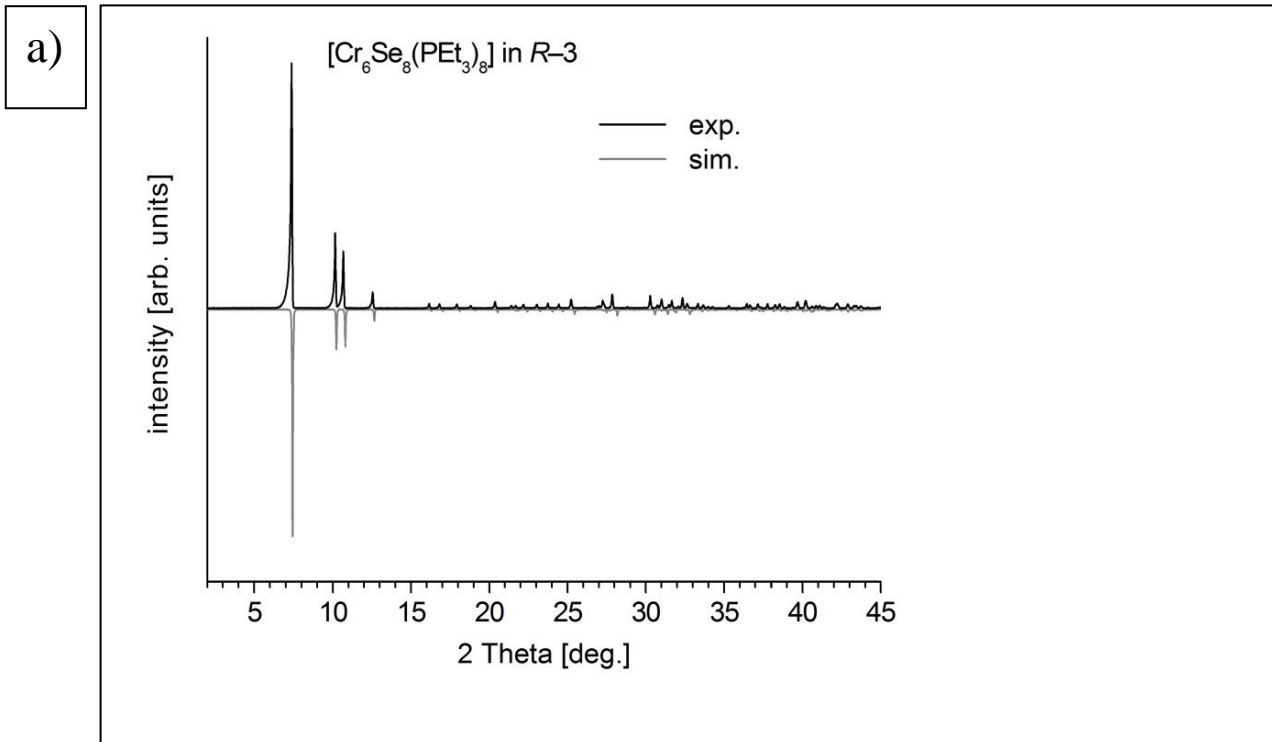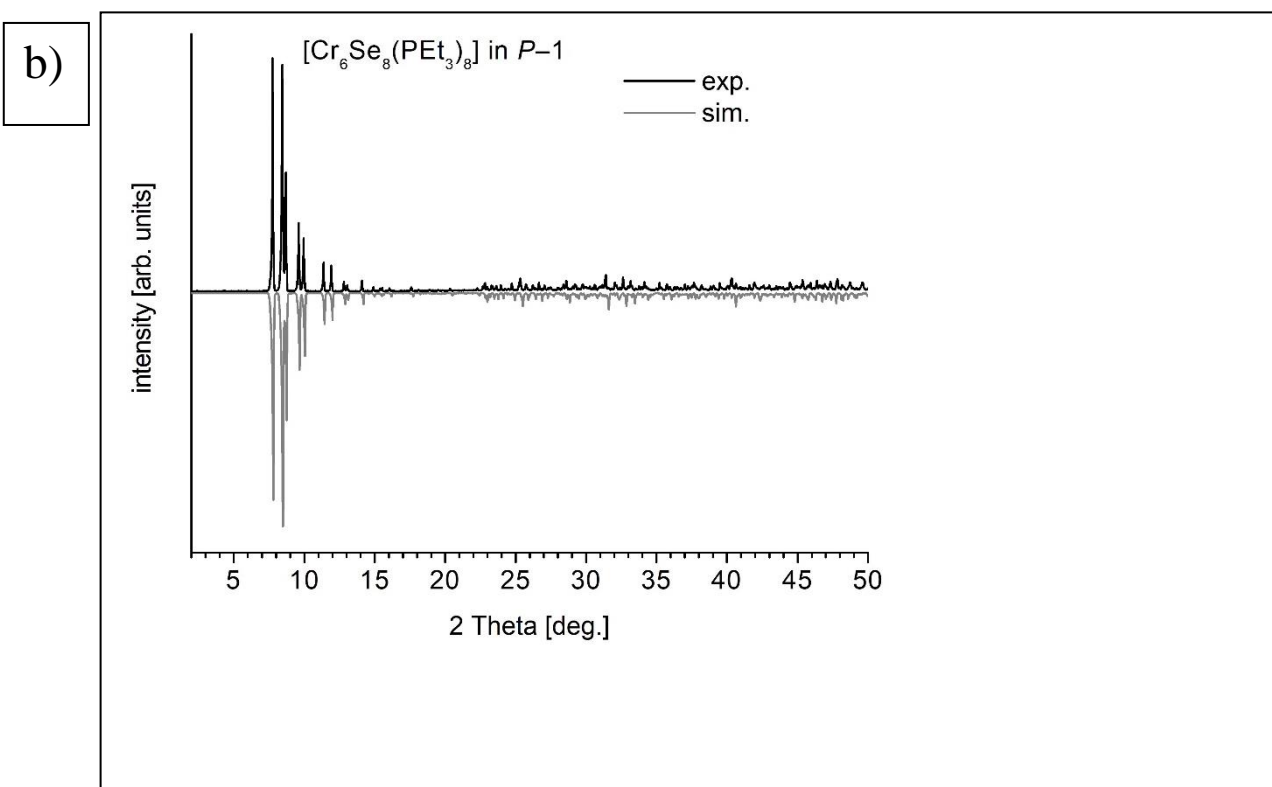

**Figure S2.** Measured (black) and simulated (grey) X-ray powder patterns ( $\text{CuK}\alpha_1$ ) for a) **2a** and b) **2b** (measured as a dried crystalline powder).



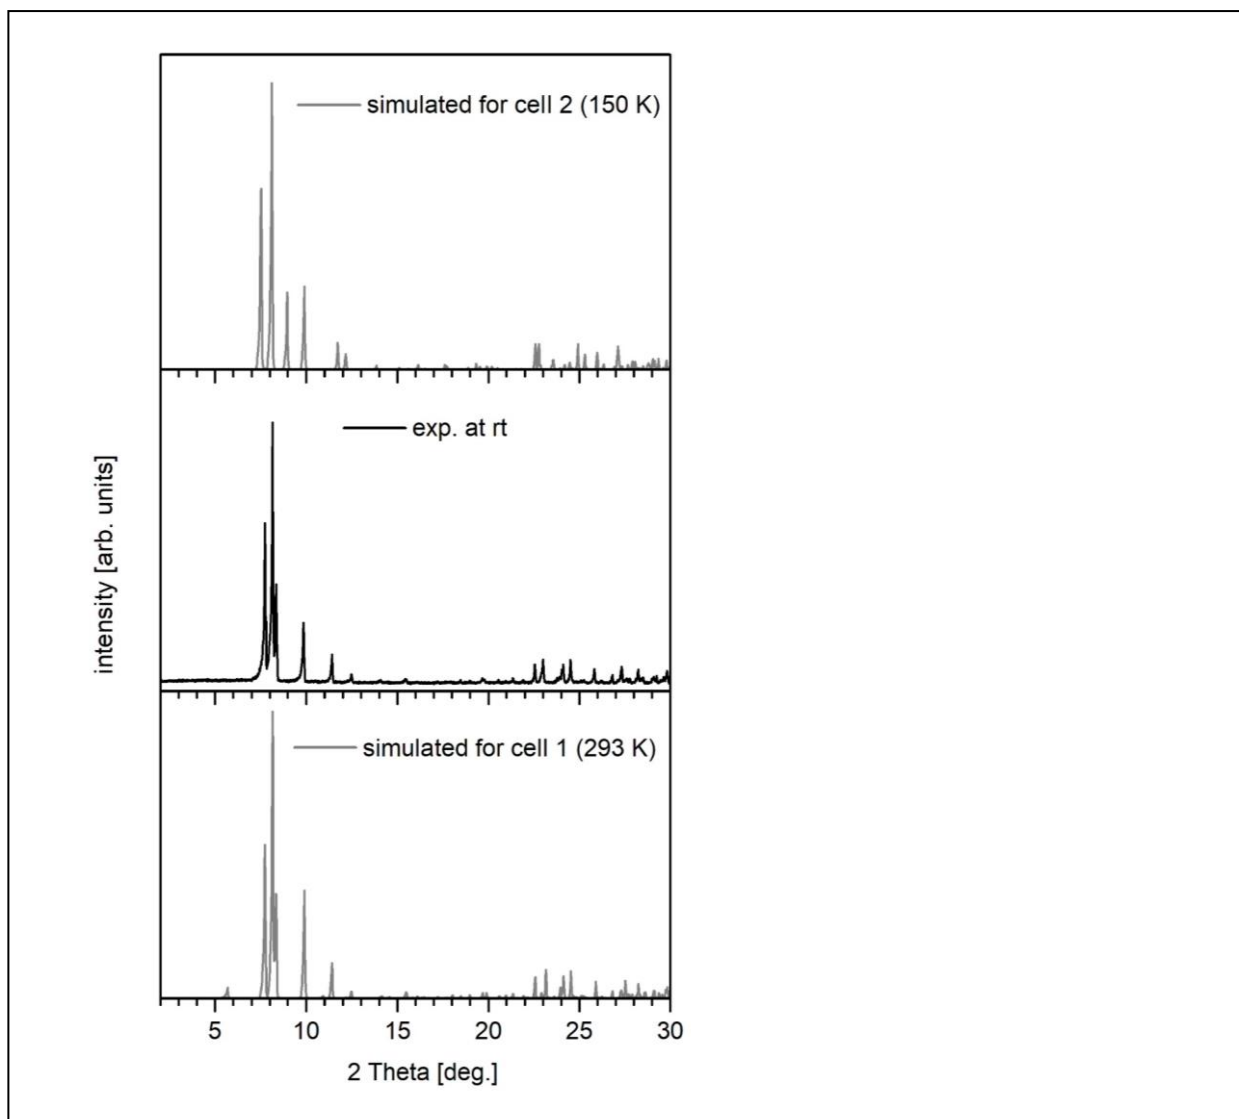

**Figure S3.** Measured (black) and simulated (grey) X-ray powder patterns ( $\text{CuK}\alpha_1$ ) for **3** (measured as a dried crystalline powder). Simulations are performed for cell 1 obtained from single crystal XRD at 293 K (B. Hessen, T. Siegrist, T. Palstra, S. M. Tazler, M. L. Steigerwald, *Inorg. Chem.*, **1993**, 32, 5165-5169) and cell 2 obtained from single crystal XRD at 150 K in this work.

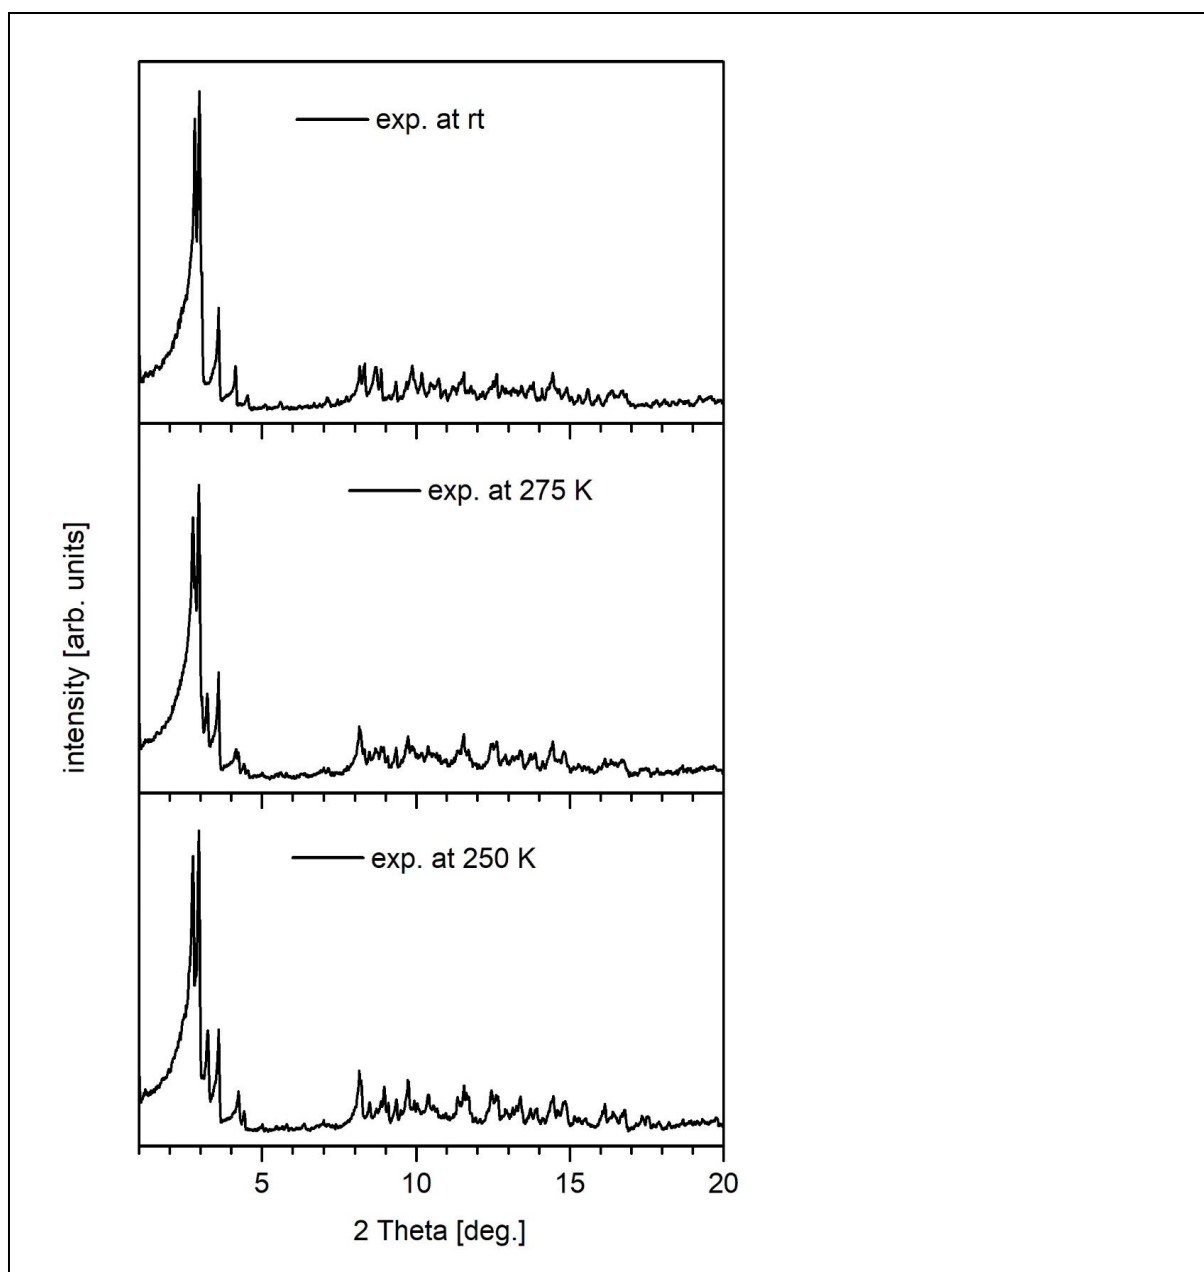

**Figure S4.** Temperature-dependent X-ray powder patterns ( $\text{AgK}\alpha_1$ ) for **3** (measured as a dried crystalline powder).

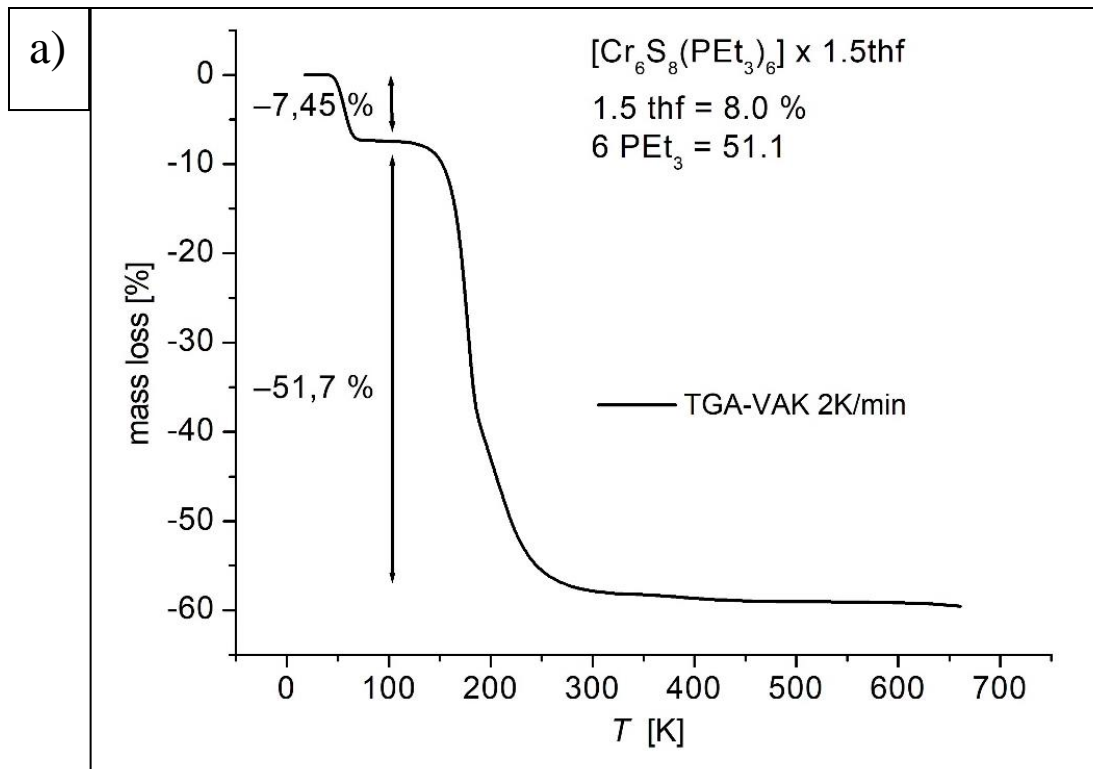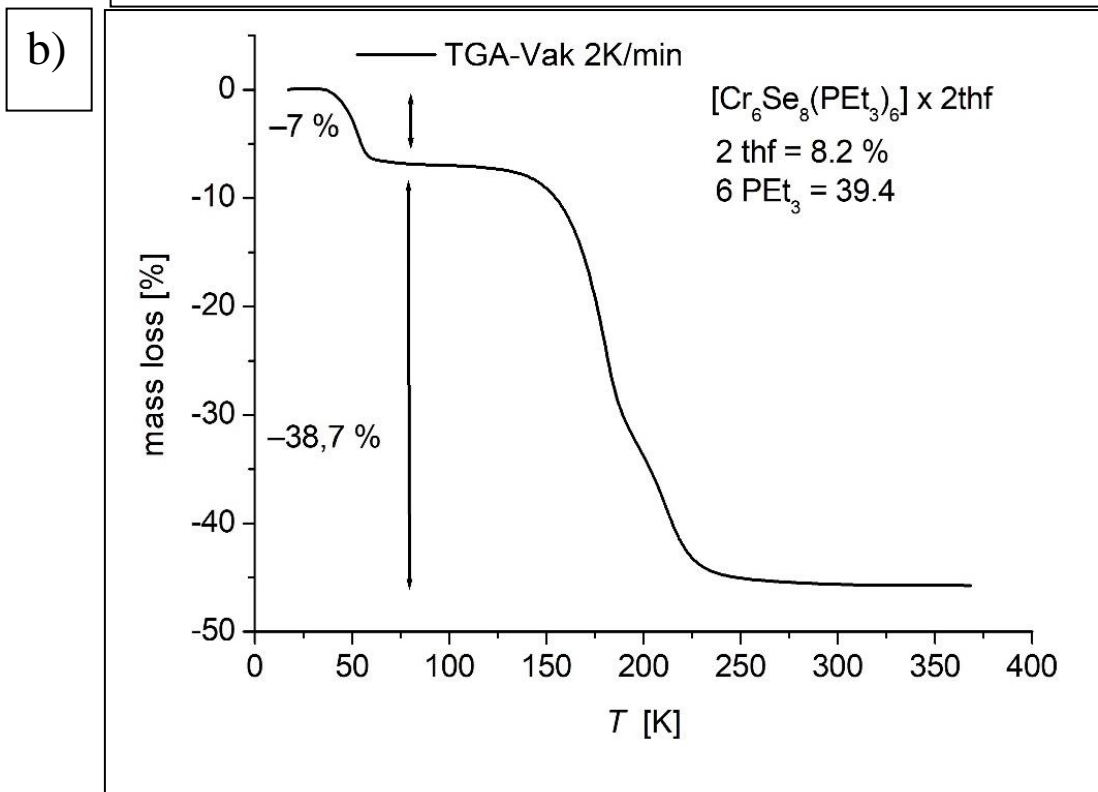

**Figure S5** Thermogravimetric analysis of a) **1a** and b) **2a** under vacuum ( $10^{-3}$  mbar).

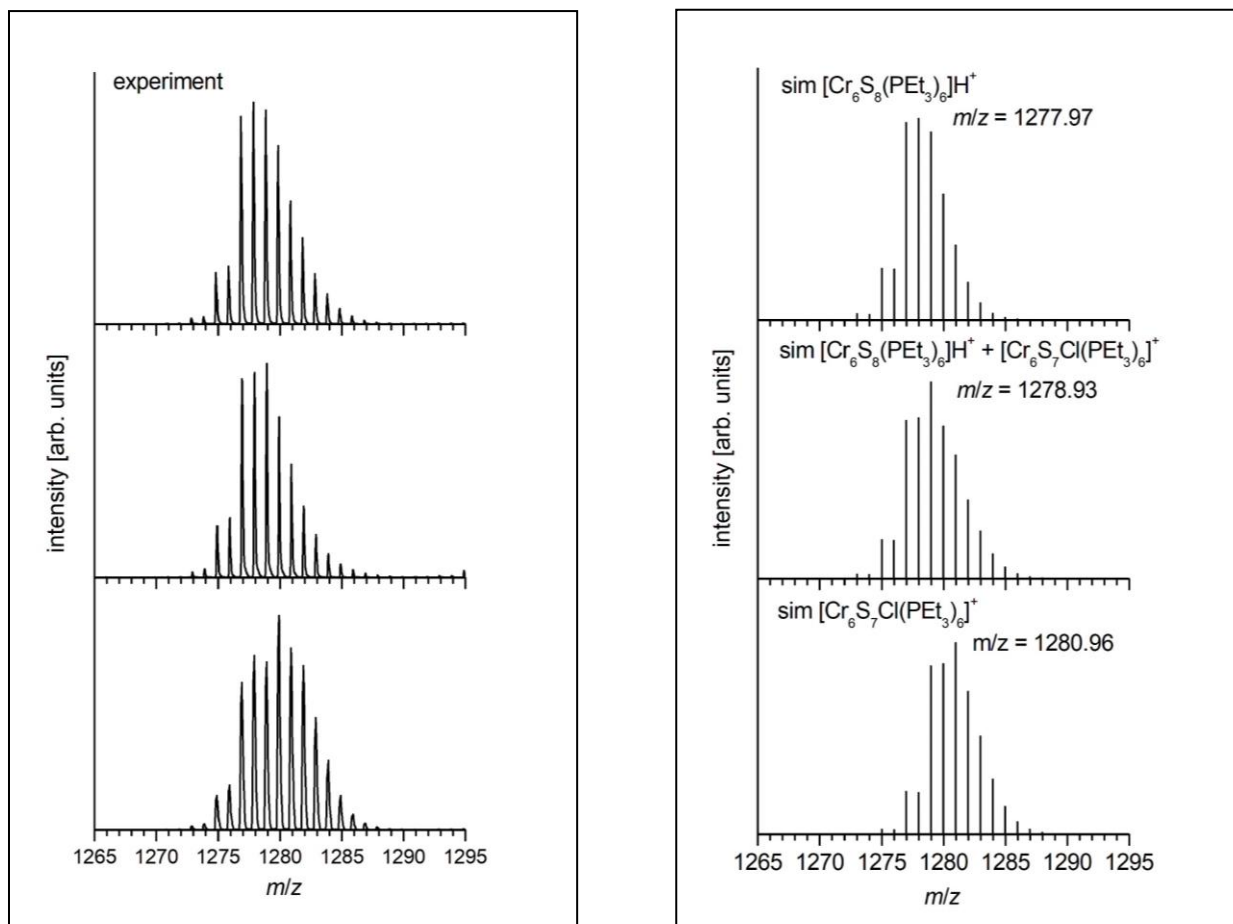

**Figure S6.** a) Variation of the molecular ion peak of the ESI-ToF mass spectra of **1a** dissolved in toluene upon change of time, b) simulation of the respective molecular ion peaks for different cluster fragments of **1a**.

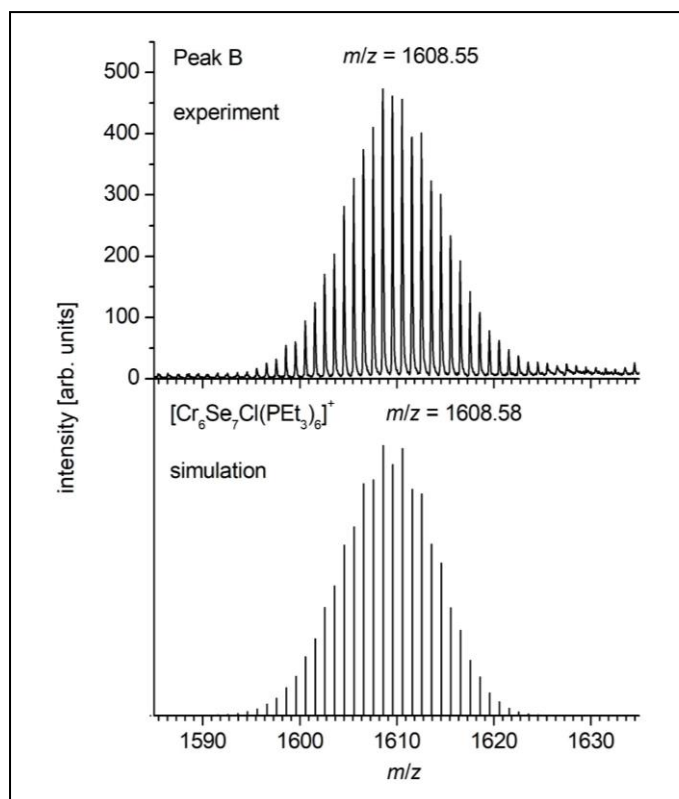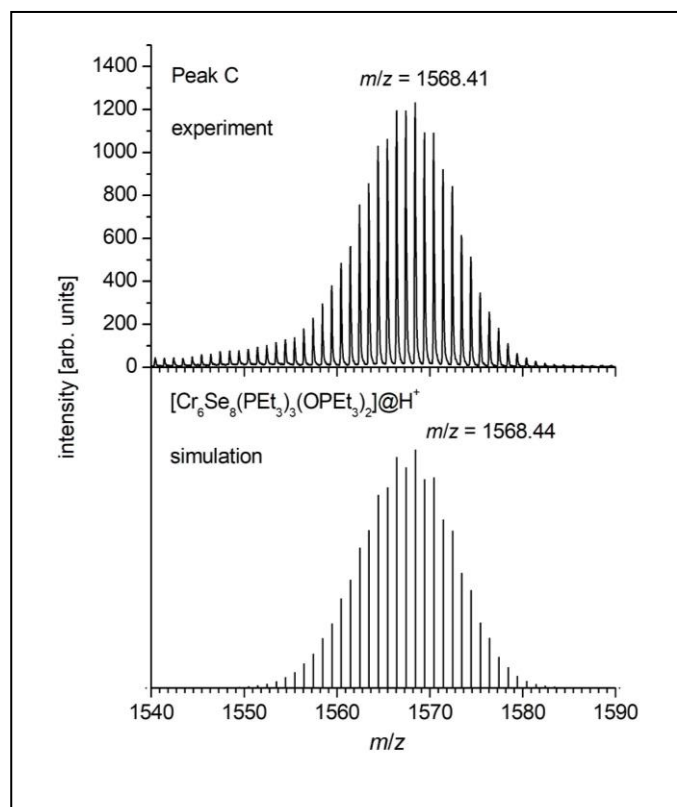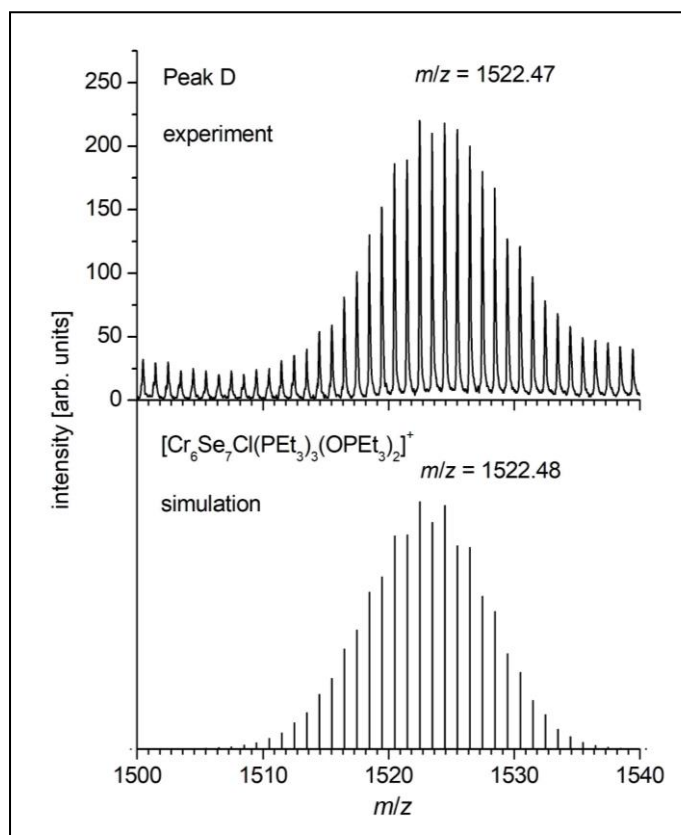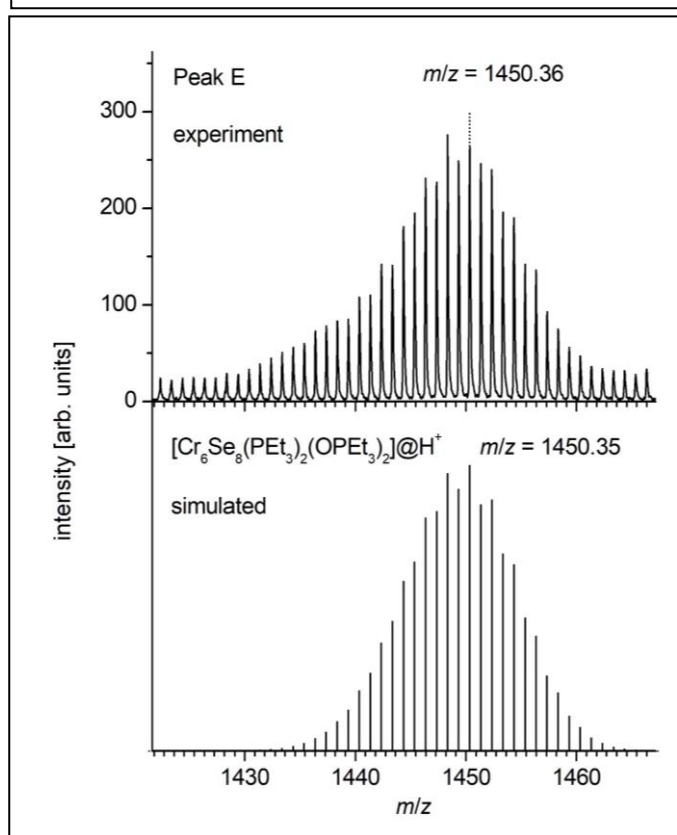

**Figure S7.** Experimental and simulated molecular fragment ion peaks B – E of the ESI-ToF mass spectra of **2a** dissolved in toluene.

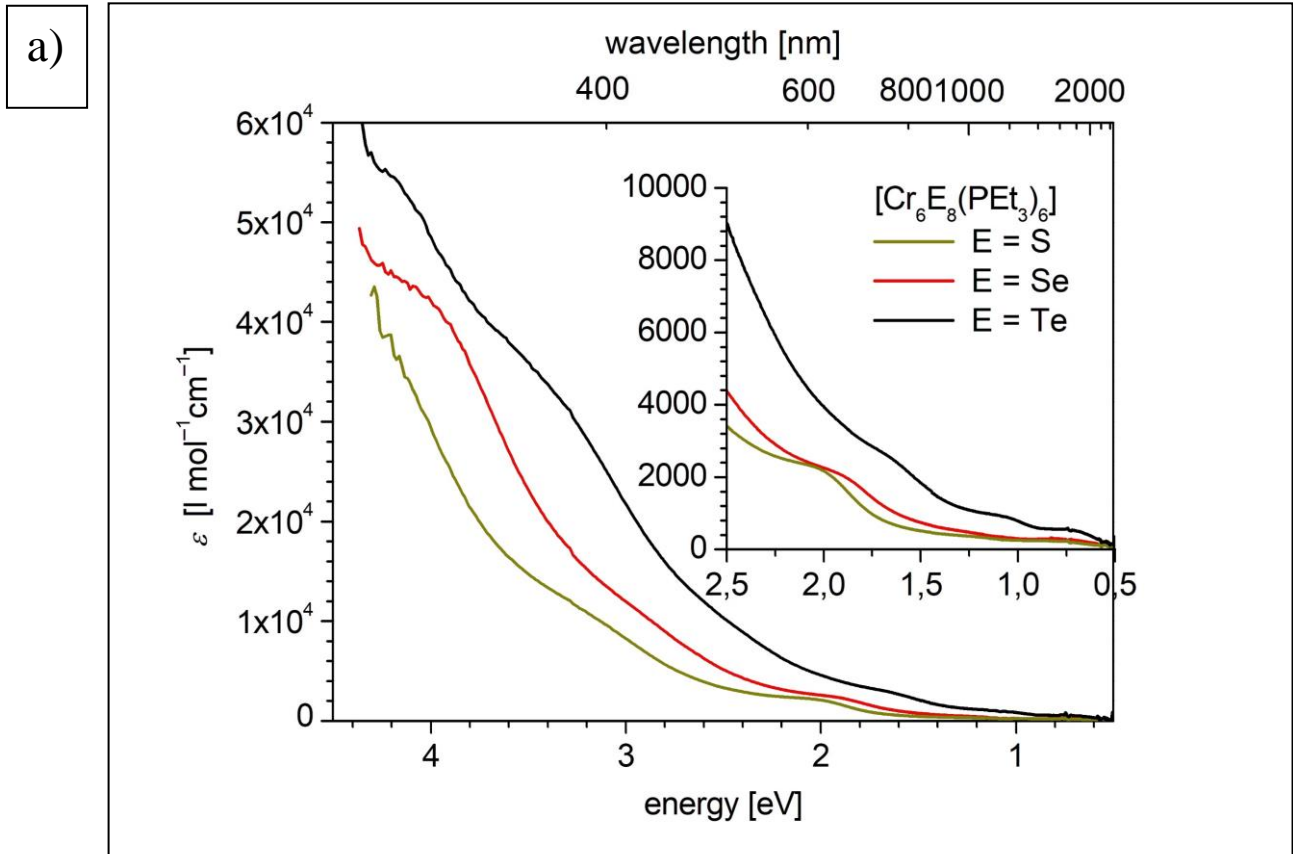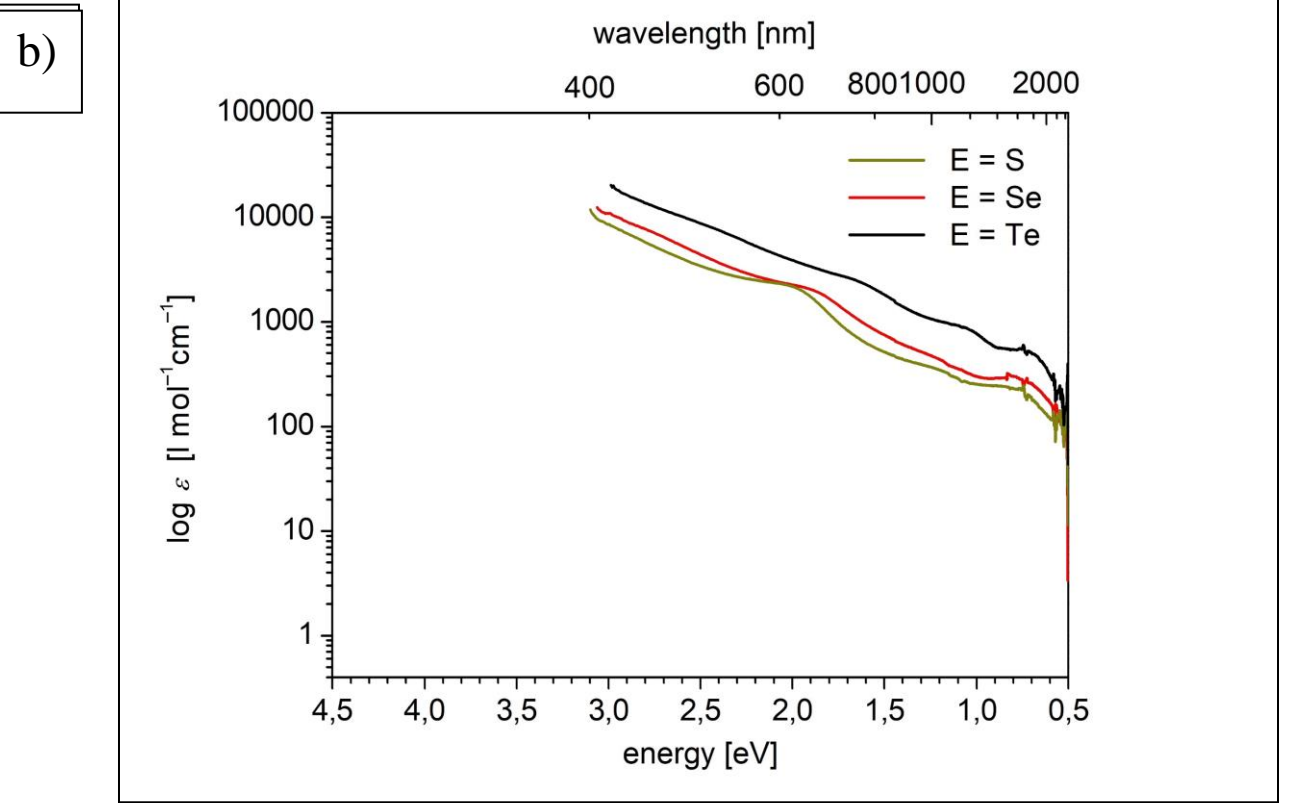

**Figure S8.** UV-Vis NIR spectra of **1a**, **2a** and **3** in toluene a) for dilute and concentrated (incept) solutions on a linear scale and b) for concentrated solutions plotted on a log scale.

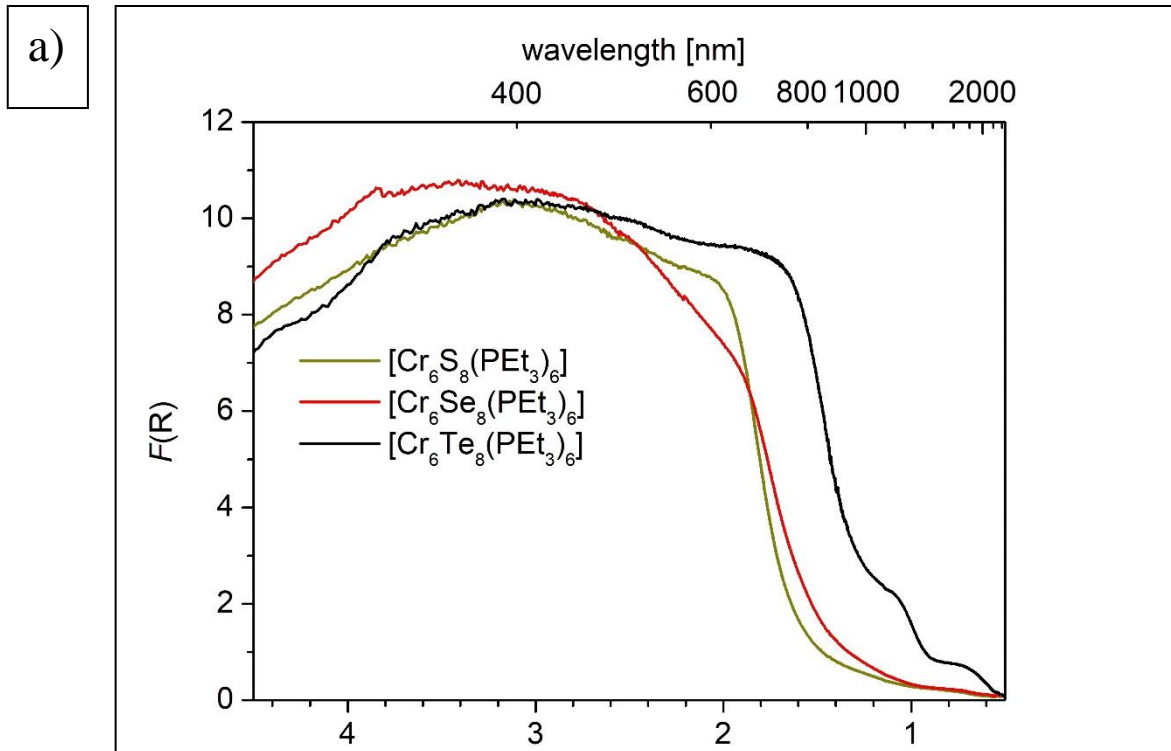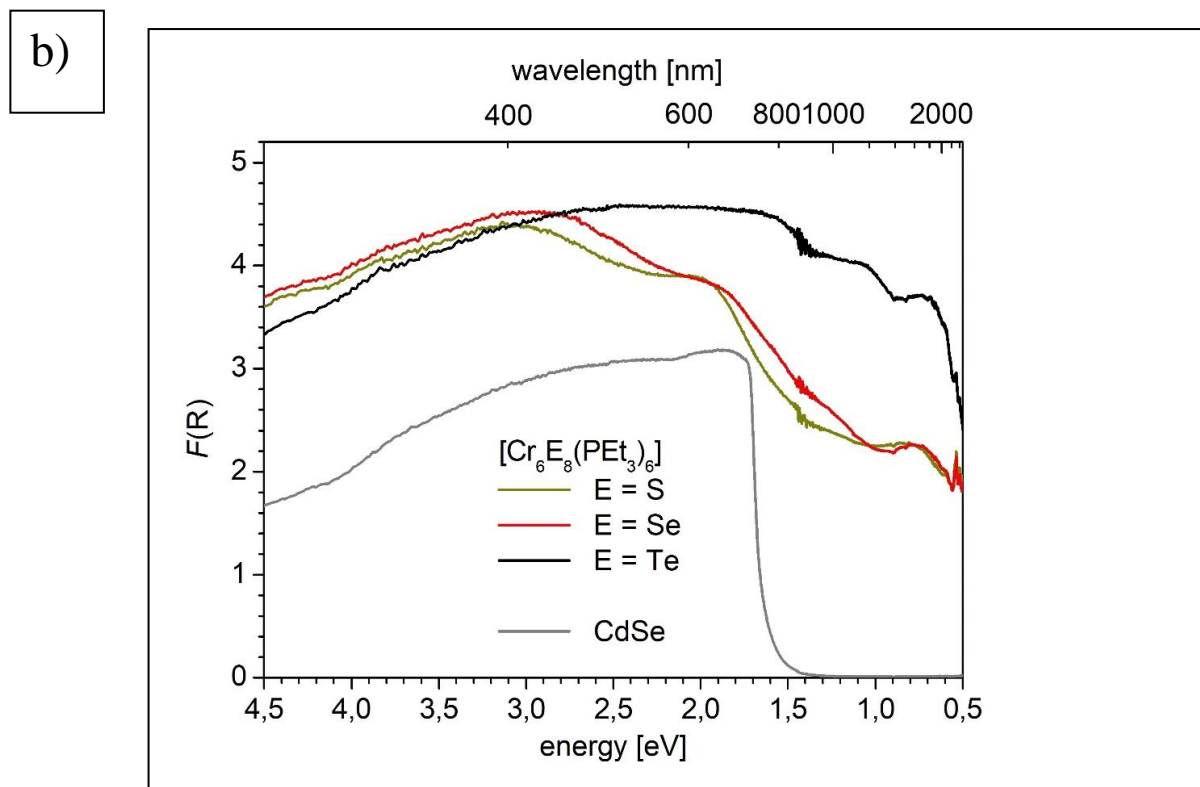

**Figure S9.** Reflection UV-Vis NIR spectra of **1a**, **2a** and **3** in solid state a) a mull in nujol and b) for microcrystalline powders in quartz cuvettes compared to the spectrum of CdSe.

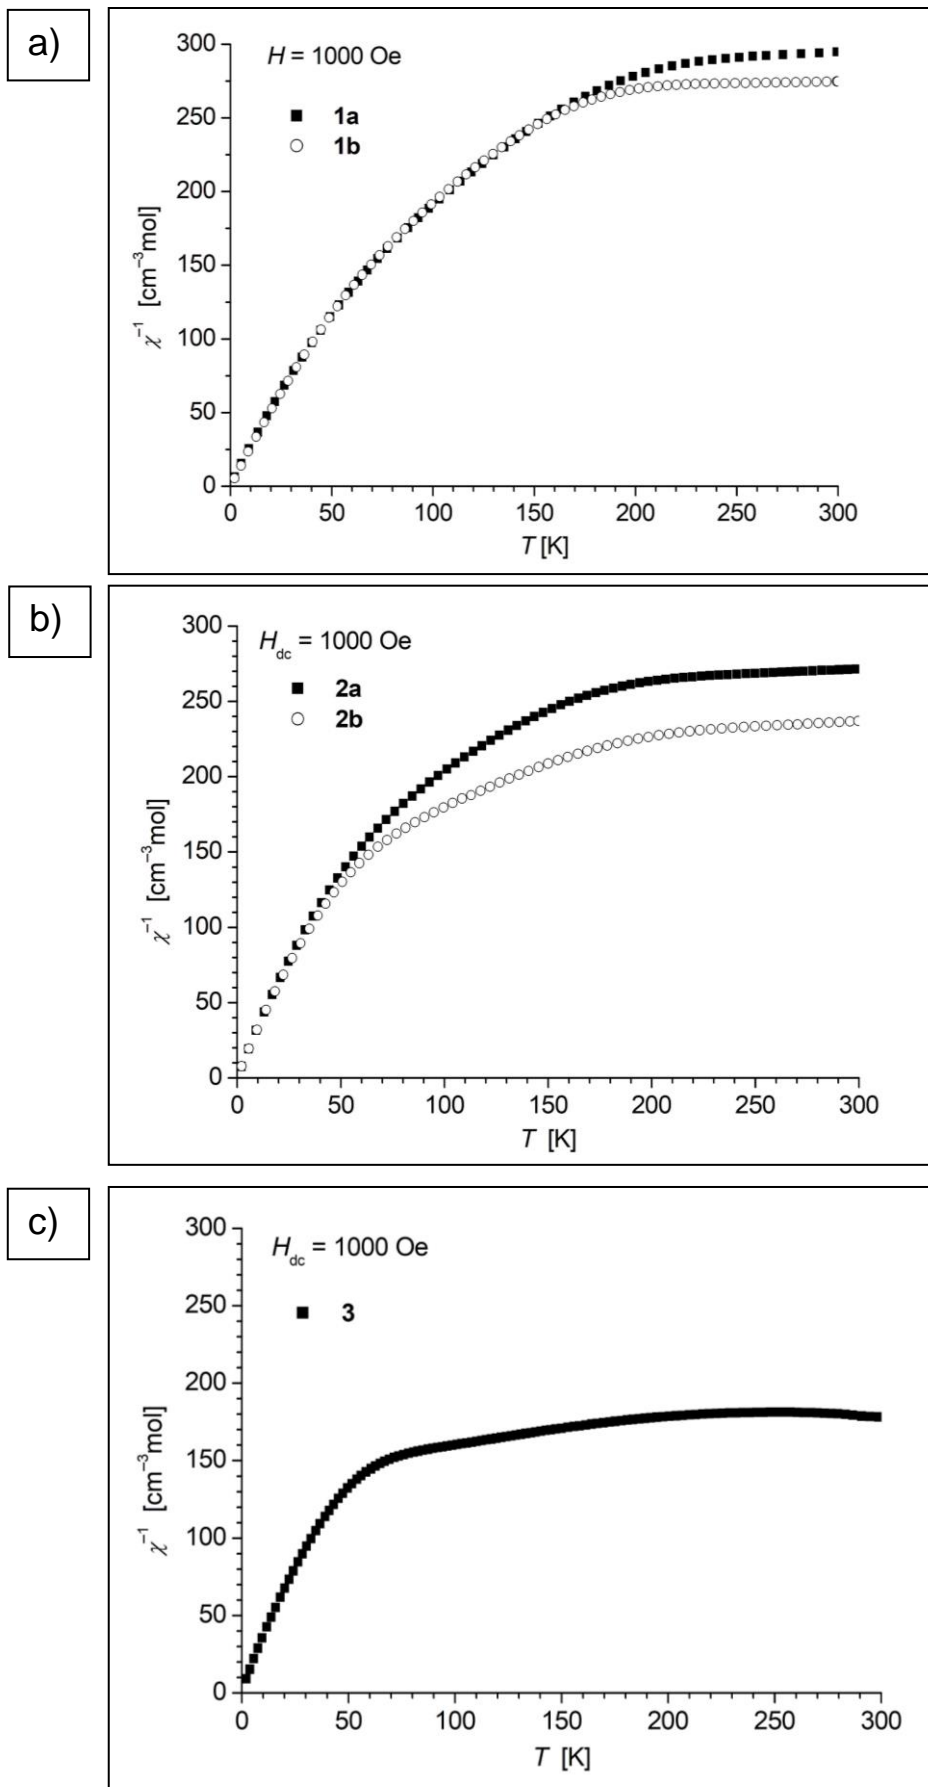

**Figure S10** Temperature dependence of  $\chi^{-1}$  of a) **1a** and **1b** b) **2a** and **2b**, c) **3**.



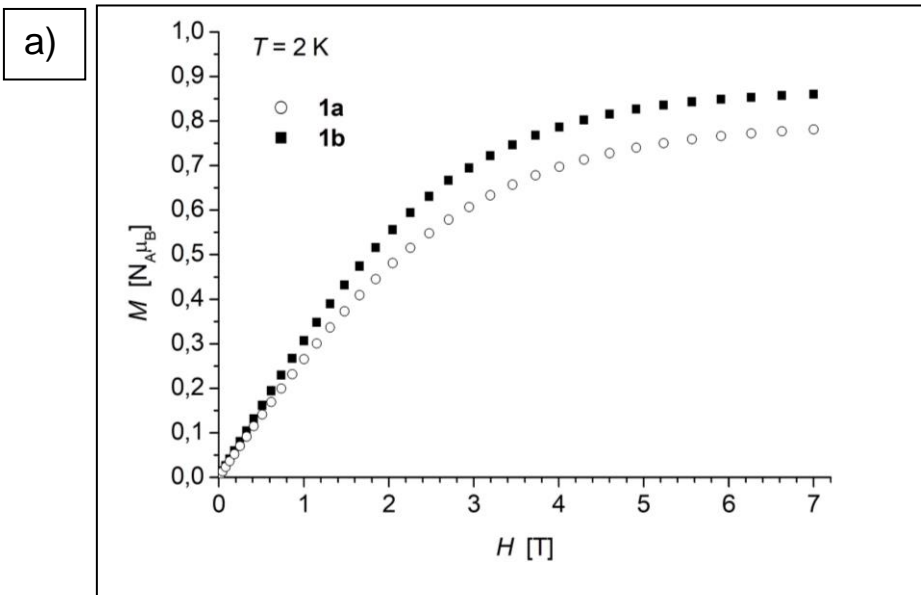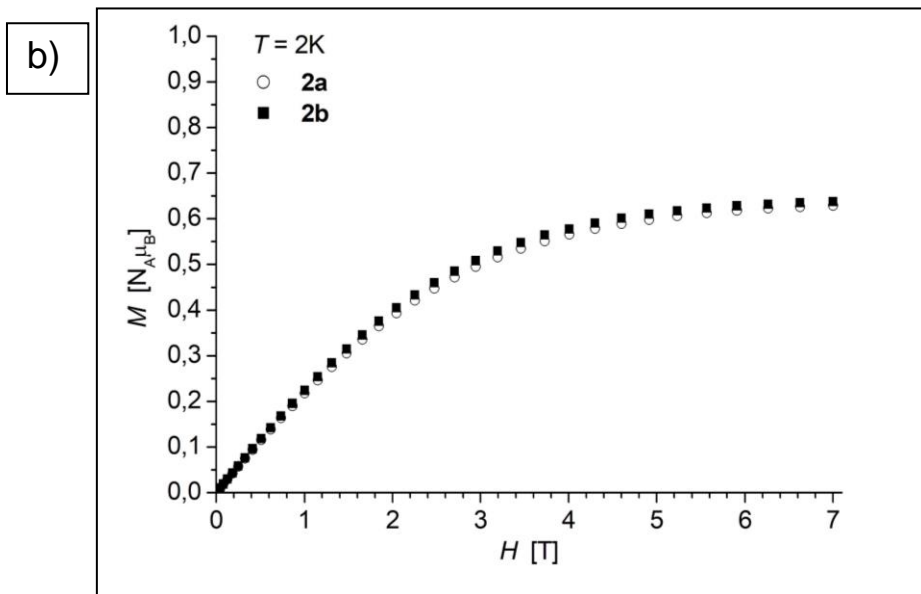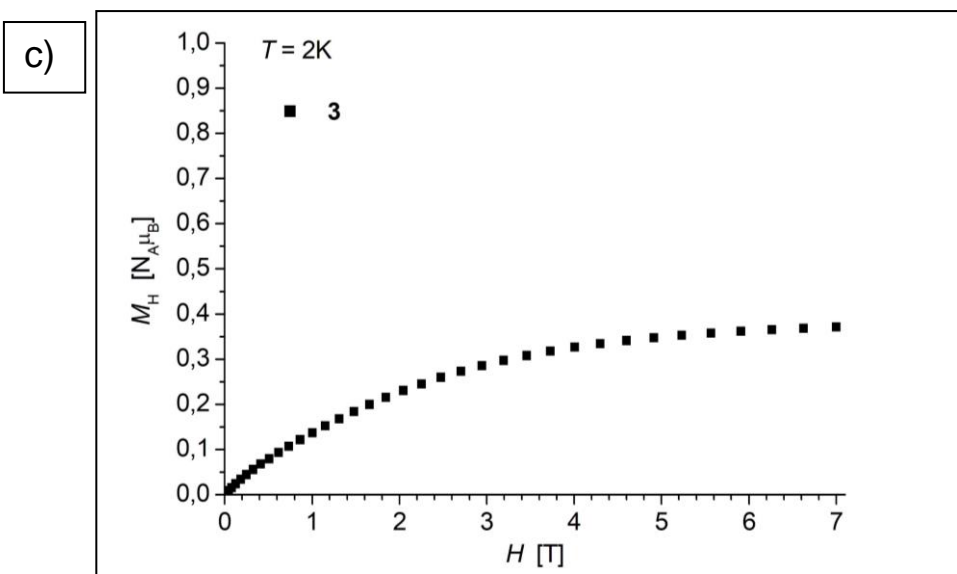

**Figure S11** Magnetization curves at 2K of a) **1a** and **1b** b) **2a** and **2b**, c) **3**.

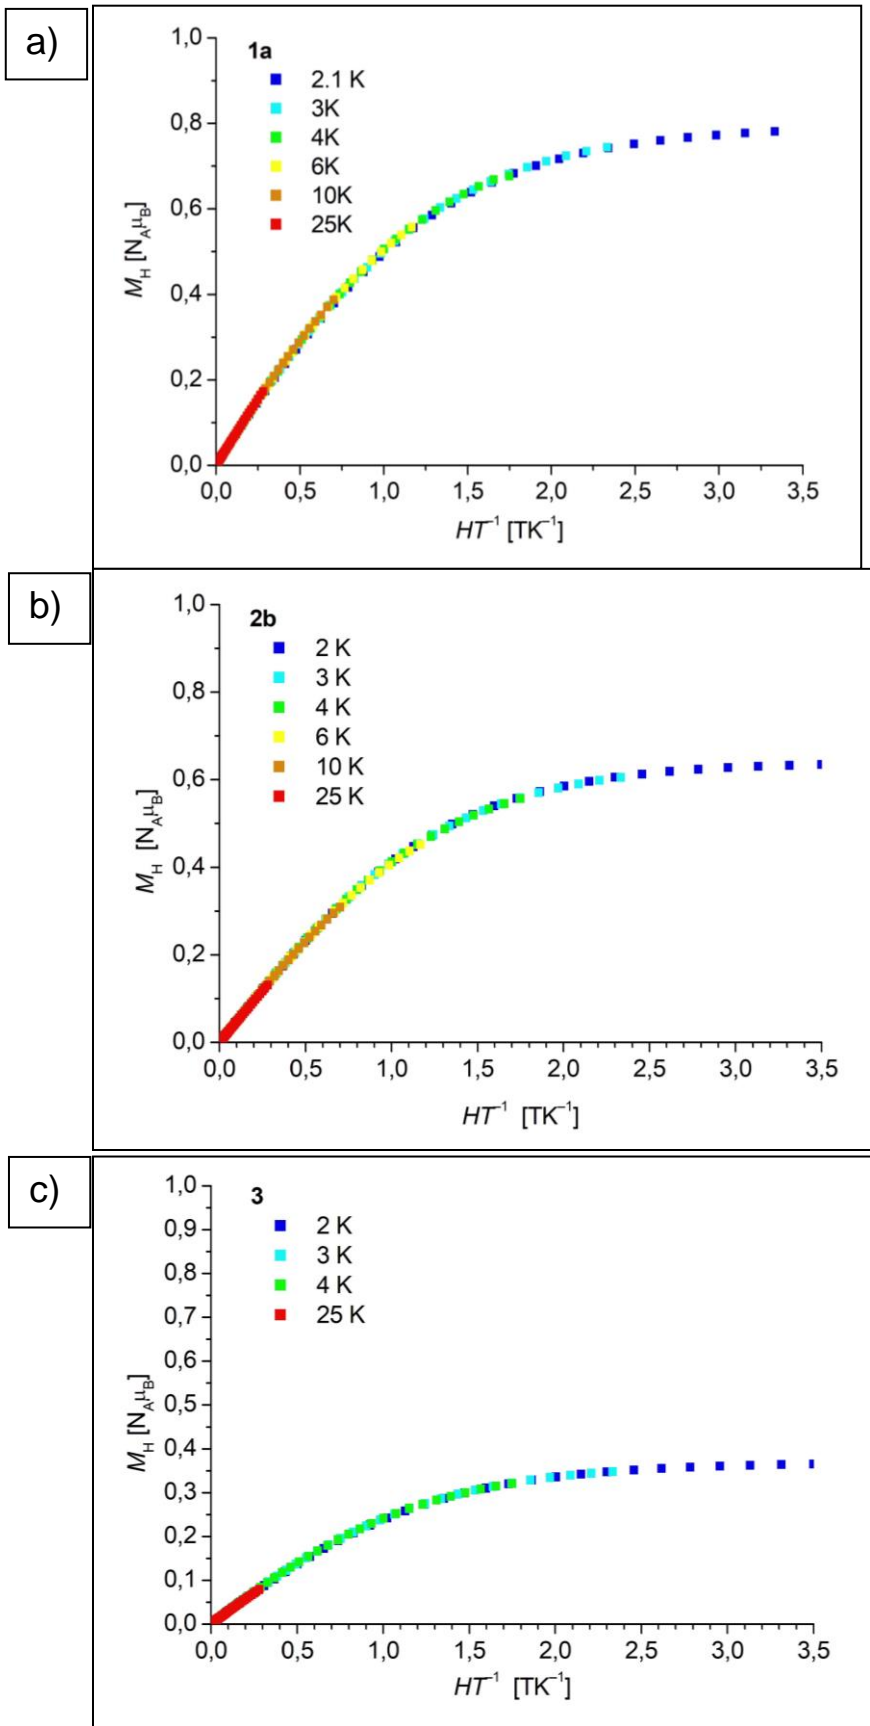

**Figure S12** Plots of the reduced magnetization curves  $M$  vs  $HT^{-1}$  at different temperatures of a) **1a**, b) **2b** and c) **3**.

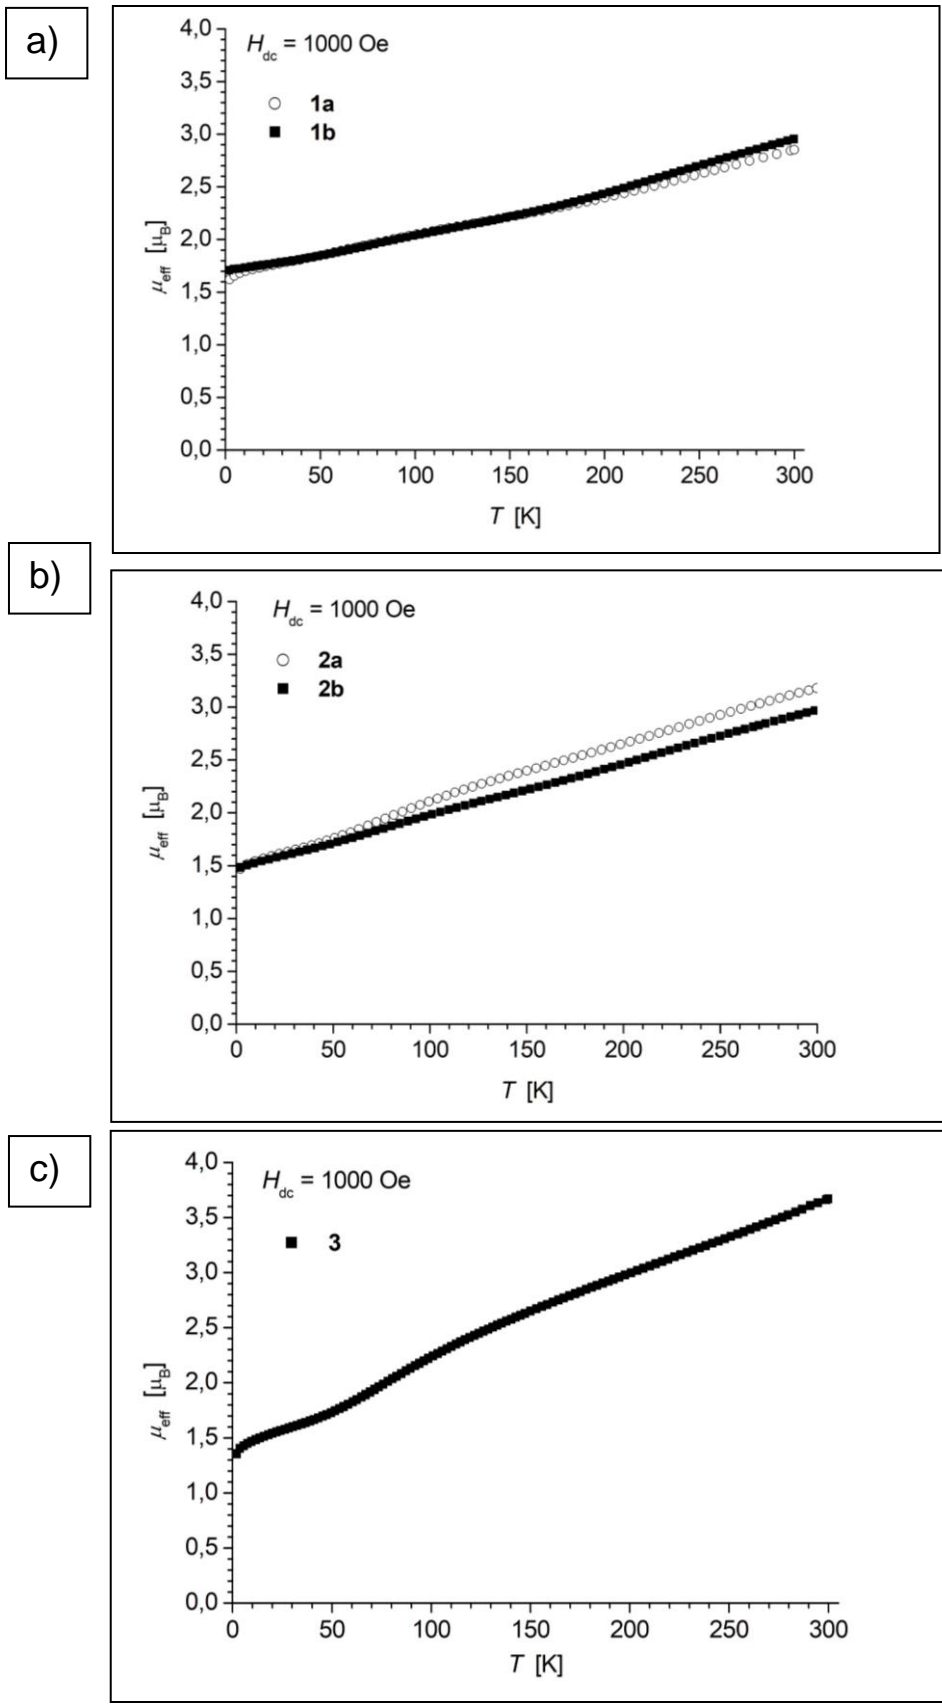

**Figure S13** Magnetic moment  $\mu_{eff}$  vs  $T$  for a) **1a** and **1b** b) **2a** and **2b**, c) **3**.

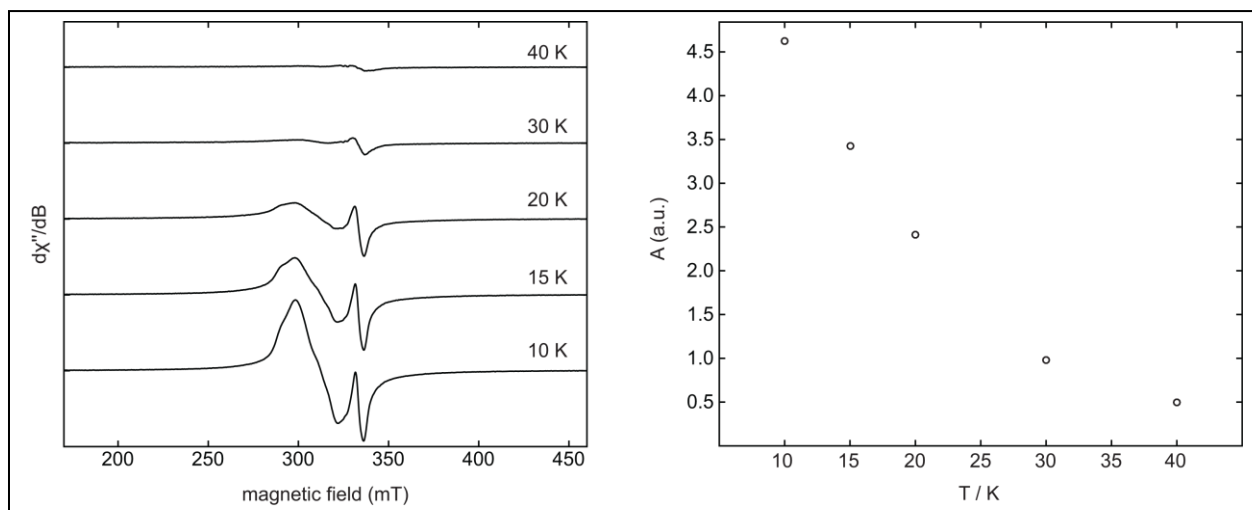

**Figure S14** a) First-derivative EPR spectra of **1a** as a microcrystalline powder at various temperatures and b) temperature dependence of the double integral EPR intensity (*A*).

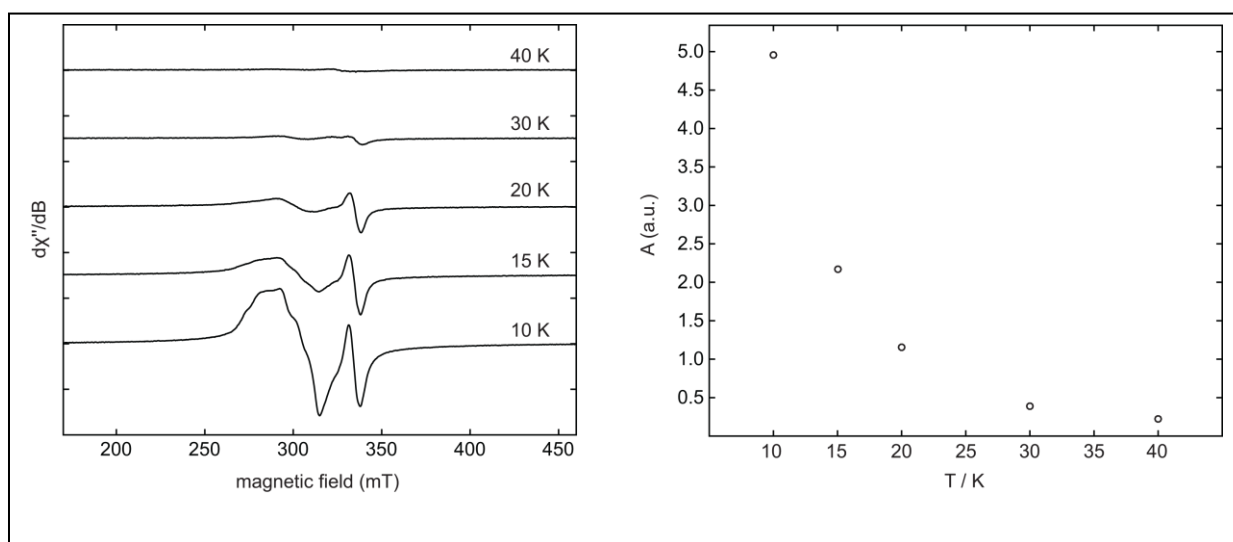

**Figure S15** a) First-derivative EPR spectra of **2a** as a microcrystalline powder at various temperatures and b) temperature dependence of the double integral EPR intensity (*A*).

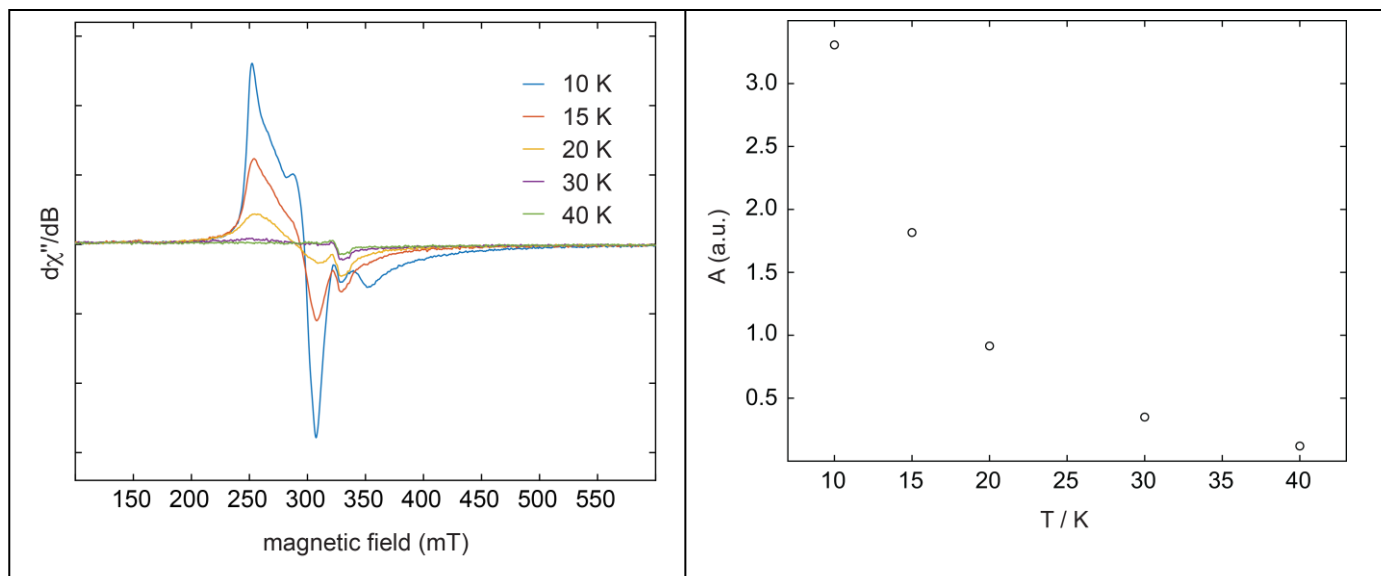

**Figure S16.** a) First-derivative EPR spectra of **3** as a microcrystalline powder at various temperatures and b) temperature dependence of the double integral EPR intensity ( $A$ ).

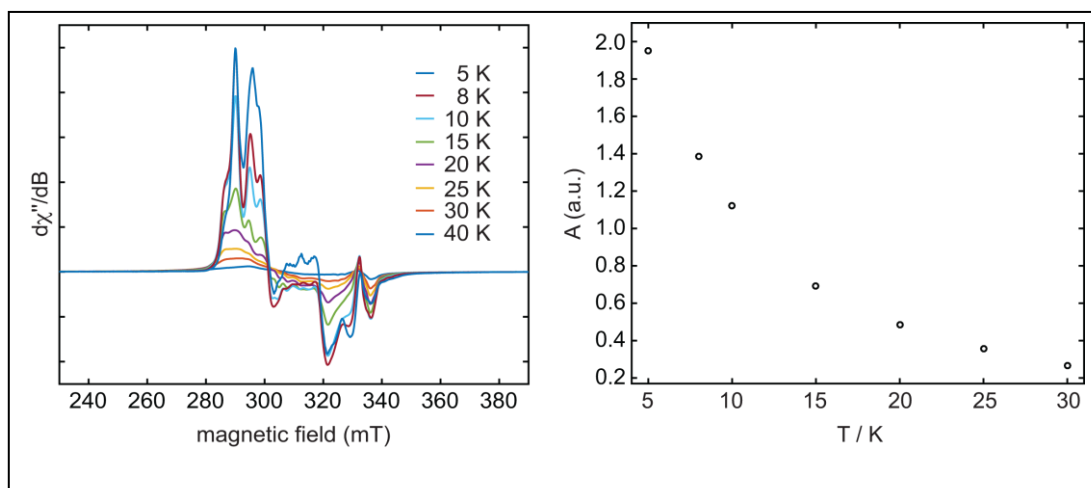

**Figure S17** a) First-derivative EPR spectra of **1a** in frozen toluene at various temperatures and b) temperature dependence of the double integral EPR intensity ( $A$ ).

**Table S4** Calculated bond energies [ $\text{kJmol}^{-1}$ ] of hydrogen in the compounds

$[\text{M}_6\text{E}_8(\text{H})(\text{PEt}_3)_6]$  ( $\text{M} = \text{Cr}, \text{Mo}$ ;  $\text{E} = \text{S}, \text{Se}$ ) <sup>a</sup>

| M  | E  | $\Delta E_1^b$ | $\Delta E_2^c$ |
|----|----|----------------|----------------|
| Cr | S  | -243.2         | -48.5          |
| Cr | Se | -270.6         | -103.2         |
| Mo | S  | -231.9         | -26.0          |
| Mo | Se | -253.7         | -69.6          |

<sup>a</sup> (PBE/def2-TZVP)

<sup>b</sup>  $\Delta E_1 = E(\text{M}_6\text{E}_8\text{H}(\text{PEt}_3)_6) - E(\text{M}_6\text{E}_8(\text{PEt}_3)_6) - E(\text{H})$

<sup>c</sup>  $\Delta E_2 = 2E(\text{M}_6\text{E}_8\text{H}(\text{PEt}_3)_6) - 2E(\text{M}_6\text{E}_8(\text{PEt}_3)_6) - E(\text{H}_2)$

**Table S5** Calculated mean Cr...Cr distances [pm] in **1** and **2** <sup>a</sup>

|              | <b>1</b>    |              |              |              |
|--------------|-------------|--------------|--------------|--------------|
|              | PBE         | PBE0         | B3LYP        | exp. (120 K) |
| <i>S</i> = 0 | 248.57±0.12 | 244.82±0.06  | 248.29±0.04  | 256.74±0.73  |
| <i>S</i> = 1 | 252.49±1.96 | 280.19±13.35 | 286.31±13.10 |              |
| <i>S</i> = 2 | 254.77±2.56 | 283.83±4.17  | 290.87±4.27  |              |
|              | <b>2</b>    |              |              |              |
| <i>S</i> = 0 | 254.14±0.10 | 250.47±0.04  | 254.03±0.12  | 263.55±0,68  |
| <i>S</i> = 1 | 256.62±3.50 | 290.20±11.46 | 298.25±11.80 |              |
| <i>S</i> = 2 | 268.91±4.09 | 294.92±4.00  | 304.52±4.21  |              |

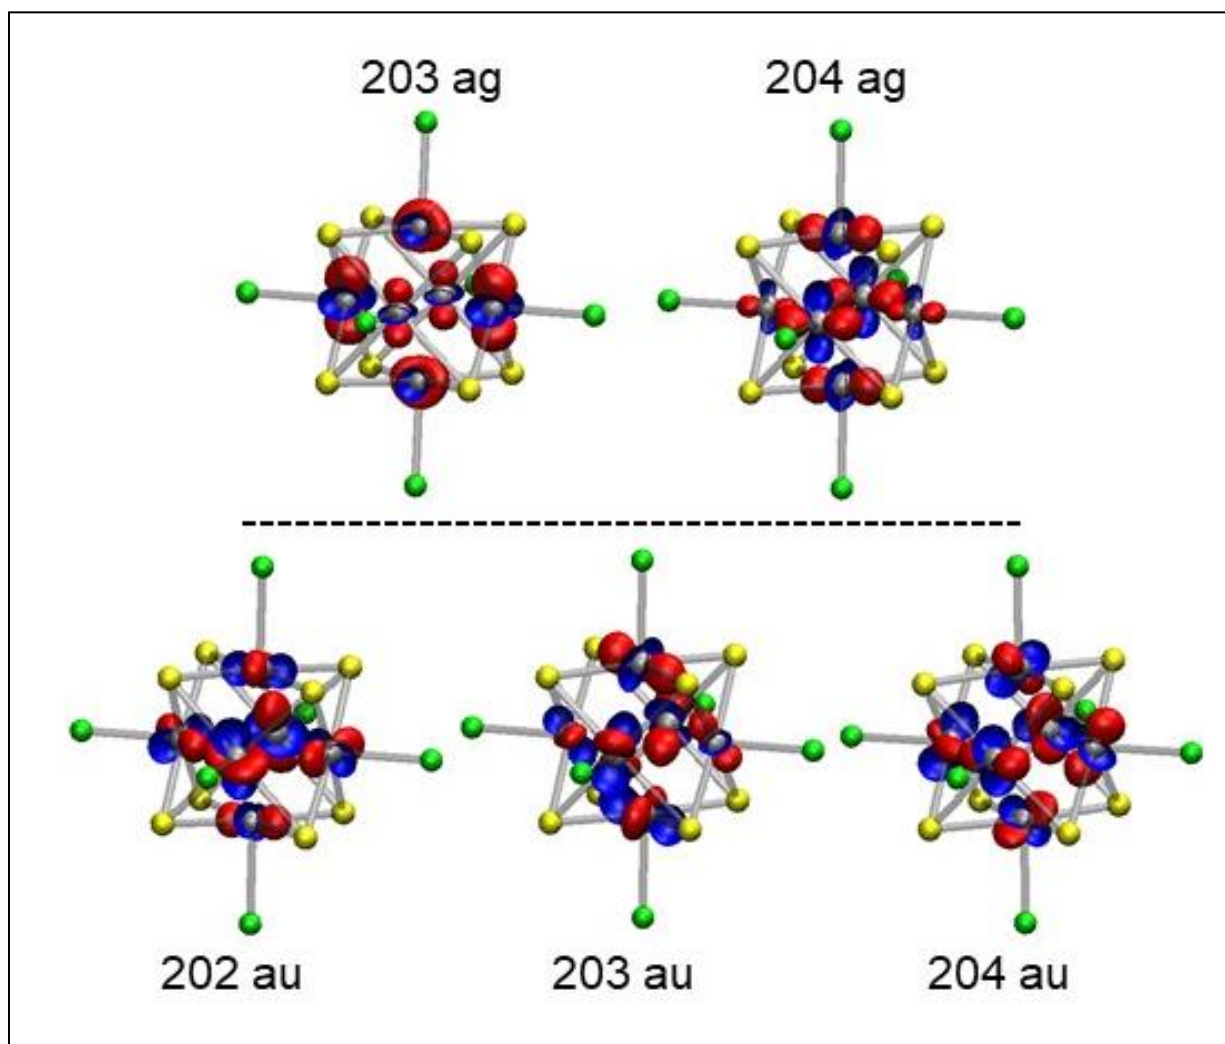

**Fig. S18** Molecular frontier orbitals of **2** (occupied in the lower row, unoccupied in the upper row). Contours are drawn at 0.06 (red) and  $-0.06$  (blue) atomic units [a.u.].



**Table S6** Contributions of Cr, S, Se, and P atoms to the molecular HOMO and LUMO orbitals of **1** and **2** from Mulliken population analysis.<sup>a</sup>

| [Cr <sub>6</sub> S <sub>8</sub> (PEt <sub>3</sub> ) <sub>6</sub> ] ( <b>1</b> ) |                   |        |      |      |      |
|---------------------------------------------------------------------------------|-------------------|--------|------|------|------|
| orbital                                                                         |                   | energy | S    | Cr   | P    |
| +1                                                                              | 168a <sub>g</sub> | -0.122 | 0.37 | 1.60 | -    |
| LUMO                                                                            | 167a <sub>g</sub> | -0.122 | 0.37 | 1.60 | -    |
|                                                                                 |                   |        |      |      |      |
| HOMO                                                                            | 168a <sub>u</sub> | -0.146 | 0.63 | 1.13 | 0,16 |
| -1                                                                              | 167a <sub>u</sub> | -0.146 | 0.65 | 1.12 | 0,14 |
| -2                                                                              | 166a <sub>u</sub> | -0.146 | 0.66 | 1.12 | 0.15 |
| -3                                                                              | 165a <sub>u</sub> | -0.149 | 0.17 | 1.72 | -    |
| -4                                                                              | 164a <sub>u</sub> | -0.149 | 0.17 | 1.72 | -    |
| -5                                                                              | 163a <sub>u</sub> | -0.149 | 0.19 | 1.72 | -    |

| [Cr <sub>6</sub> Se <sub>8</sub> (PEt <sub>3</sub> ) <sub>6</sub> ] ( <b>2</b> ) |                   |        |      |      |      |
|----------------------------------------------------------------------------------|-------------------|--------|------|------|------|
| orbital                                                                          |                   | energy | Se   | Cr   | P    |
| +1                                                                               | 204a <sub>g</sub> | -0.121 | 0.40 | 1.54 | -    |
| LUMO                                                                             | 203a <sub>g</sub> | -0.121 | 0.41 | 1.54 | -    |
|                                                                                  |                   |        |      |      |      |
| HOMO                                                                             | 204a <sub>u</sub> | -0.147 | 0.24 | 1.64 | -    |
| -1                                                                               | 203a <sub>u</sub> | -0.147 | 0.28 | 1.60 | -    |
| -2                                                                               | 202a <sub>u</sub> | -0.147 | 0.31 | 1.57 | -    |
| -4                                                                               | 201a <sub>u</sub> | -0.148 | 0.56 | 1.26 | 0.11 |
| -5                                                                               | 200a <sub>u</sub> | -0.148 | 0.61 | 1.20 | 0.10 |
| -8                                                                               | 199a <sub>u</sub> | -0.149 | 0.59 | 1.23 | 0.11 |

<sup>a</sup> the total Mulliken population for each orbital amounts to 2 (= orbital occupation number).

**Table S7** Lowest energy and dipole active singlet transitions in **1** and **2** <sup>a,b</sup>

| $[\text{Cr}_6\text{S}_8(\text{PEt}_3)_6]$ ( <b>1</b> ) |            |            |                                                                                        | $[\text{Cr}_6\text{Se}_8(\text{PEt}_3)_6]$ ( <b>2</b> ) |            |             |                                                                      |
|--------------------------------------------------------|------------|------------|----------------------------------------------------------------------------------------|---------------------------------------------------------|------------|-------------|----------------------------------------------------------------------|
|                                                        | $\Delta E$ | $f$        |                                                                                        |                                                         | $\Delta E$ | $f$         |                                                                      |
| 1au                                                    | 0,67987    | 4,30486E-5 | H+0>L+0 (0.65)<br>H-1>L+0 (0.13)                                                       | 1au                                                     | 0,71252    | 3,10733E-05 | H+0>L+0 (0.38)<br>H-2>L+0 (0.21)<br>H-1>L+1 (0.13)<br>H+0>L+1 (0.12) |
| 2au                                                    | 0,68155    | 3,64301E-5 | H+0>L+1 (0.49)<br>H-2>L+0 (0.23)<br>H-1>L+1 (0.10)                                     | 2au                                                     | 0,71434    | 1,96453E-05 | H-1>L+0 (0.31)<br>H+0>L+1 (0.29)<br>H-2>L+1 (0.19)                   |
| 3au                                                    | 0,68425    | 3,62048E-5 | H-1>L+1 (0.43)<br>H-2>L+0 (0.23)<br>H-2>L+1 (0.16)                                     | 3au                                                     | 0,71935    | 1,11923E-04 | H-2>L+1 (0.26)<br>H-4>L+0 (0.24)<br>H-1>L+0 (0.23)<br>H-5>L+1 (0.12) |
| 4au                                                    | 0,70625    | 0,00171    | H-1>L+0 (0.42)<br>H+0>L+1 (0.26)<br>H+0>L+0 (0.12)<br>H-1>L+1 (0.11)                   | 4au                                                     | 0,76003    | 5,26970E-04 | H-4>L+0 (0.40)<br>H-2>L+0 (0.23)<br>H-1>L+1 (0.20)                   |
| 5au                                                    | 0,70729    | 0,00169    | H-2>L+0 (0.38)<br>H+0>L+1 (0.19)<br>H-1>L+0 (0.15)<br>H-1>L+1 (0.12)<br>H+0>L+0 (0.12) | 5au                                                     | 0,76953    | 9,19305E-04 | H-4>L+1 (0.59)<br>H-5>L+0 (0.18)                                     |
| 6au                                                    | 0,70988    | 0,00173    | H-2>L+1 (0.61)<br>H-1>L+1 (0.13)<br>H-1>L+0 (0.11)                                     | 6au                                                     | 0,77132    | 0,00104     | H-5>L+1 (0.61)<br>H-4>L+0 (0.12)                                     |
| 7au                                                    | 0,77946    | 4,10046E-6 | H-3>L+0 (0.55)<br>H-5>L+0 (0.20)                                                       | 7au                                                     | 0,77486    | 0,00151     | H-5>L+0 (0.61)<br>H-4>L+1 (0.19)                                     |
| 8au                                                    | 0,78052    | 3,27237E-6 | H-3>L+1 (0.36)<br>H-4>L+0 (0.20)<br>H-4>L+1 (0.16)<br>H-5>L+1 (0.15)                   | 8au                                                     | 0,78312    | 0,00113     | H-8>L+0 (0.80)                                                       |
| 9au                                                    | 0,78315    | 2,6985E-5  | H-5>L+1 (0.30)<br>H-4>L+1 (0.29)<br>H-5>L+0 (0.20)<br>H-4>L+0 (0.12)                   | 9au                                                     | 0,78737    | 0,00121     | H-8>L+1 (0.84)                                                       |
| 10au                                                   | 0,99738    | 7,27851E-4 | H-4>L+0 (0.43)<br>H-5>L+0 (0.25)<br>H-4>L+1 (0.13)                                     | 10au                                                    | 0,94599    | 5,26699E-04 | H+0>L+0 (0.35)<br>H-2>L+0 (0.14)<br>H-8>L+0 (0.11)                   |

<sup>a</sup> calculated by TDDFT with the PBE functional.

<sup>b</sup> notification, energy  $\Delta E$  [eV], oscillator strength  $f$ , involved orbitals.

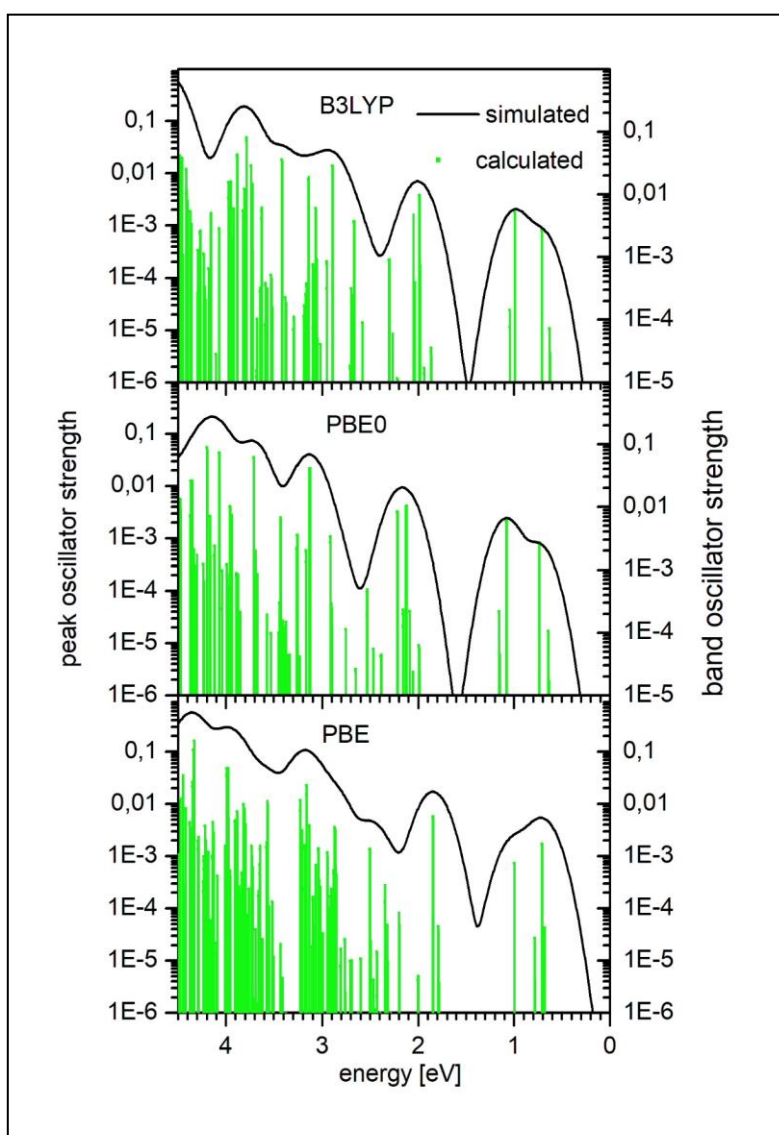

**Figure S19.** Calculated (TDDFT) electronic spectra of **1** calculated with three different functionals on log scales (B3LYP, PBE0, and PBE from top to bottom). Simulated spectra (black line) with superimposed Gaussians of FWHM = 0.3 eV were obtained from the calculated singlet excitation energies (green lines).

**Table S8** Calculated energy differences  $\Delta E^a$  [kJ mol<sup>-1</sup>] in **1** and **2** of the  $S = 1$  and  $S = 2$  states <sup>b</sup> to the  $S = 0$  state

|                    | <b>1</b> |         | <b>2</b> |         |
|--------------------|----------|---------|----------|---------|
|                    | $S = 1$  | $S = 2$ | $S = 1$  | $S = 2$ |
| $\Delta E$ (PBE)   | 30.5     | 38.8    | 25.9     | -2.43   |
| $\Delta E$ (PBE0)  | -432.8   | -658.0  | -514.6   | -746.8  |
| $\Delta E$ (B3LYP) | -387.1   | -591.0  | -470.7   | -681.8  |

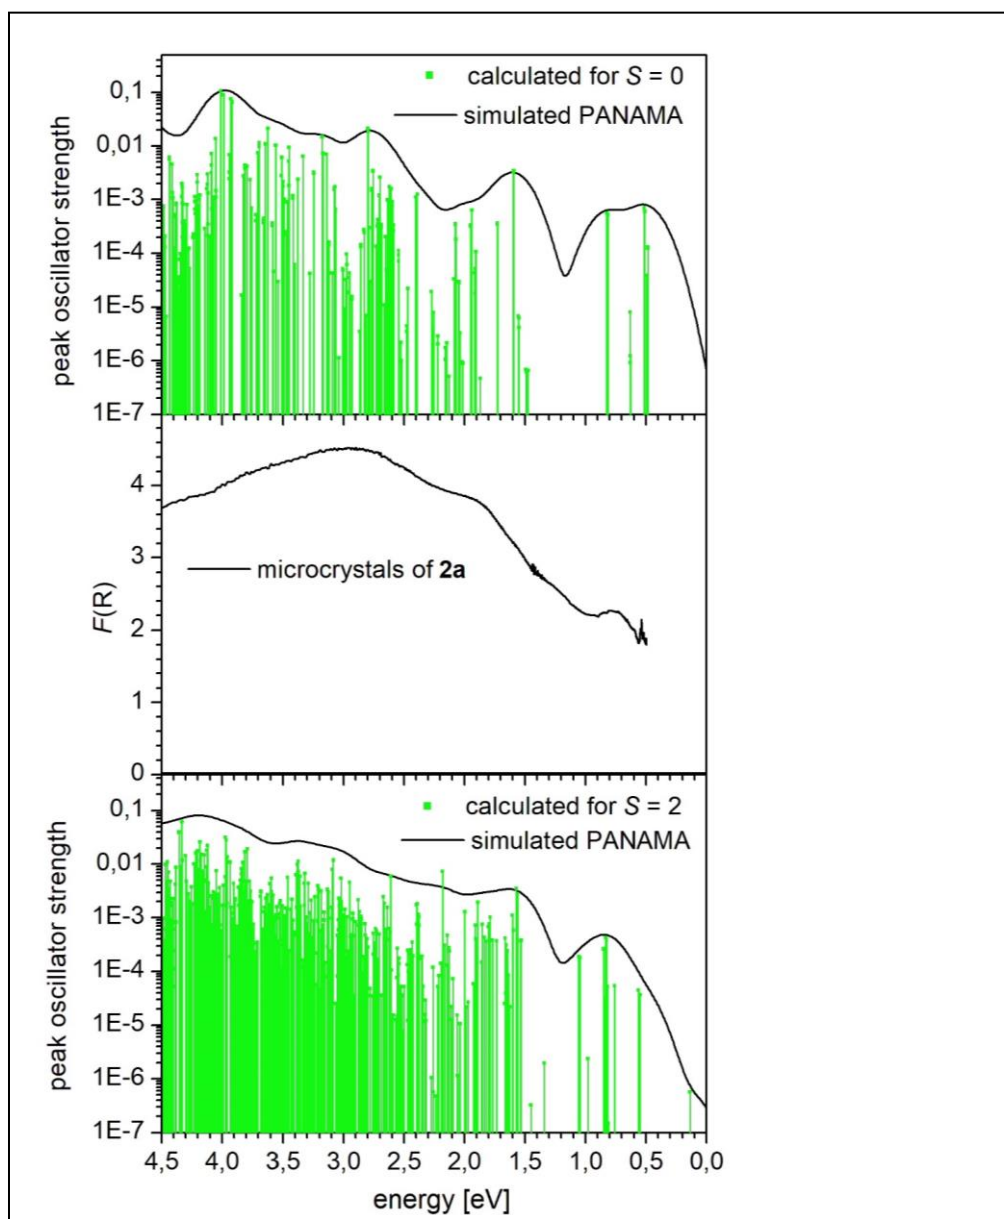

**Figure S20.** Experimental (powdered crystals in mineral oil) and calculated (TDDFT) electronic spectra of **2**. Panels up and down: calculated singlet excitation energies and oscillator strengths (green lines) on log scales and simulated spectra with superimposed Gaussians of FWHM = 0.3 eV for the closed shell state ( $S = 0$ ) and the 2<sup>nd</sup> excited state ( $S = 2$ ) of **2**; the middle panel displays the reflection spectrum of microcrystals of **2a**.
